# Supplementary material for: SNEVhPrp19/hPso4 Regulates Adipogenesis of Human Adipose Stromal Cells
Source: PubMed Central journal article supplement — Stem Cell Reports. 2016 Dec 29;8(1):21–9. doi: 10.1016/j.stemcr.2016.12.001 (PMC5233435; doi:10.1016/j.stemcr.2016.12.001), 2016-12-29
Supplement: mmc1.pdf [file mmc1.pdf]

**Stem Cell Reports, Volume 8**

## **Supplemental Information**

### **SNEV<sup>hPrp19/hPso4</sup> Regulates Adipogenesis of Human Adipose Stromal Cells**

**Abdulhameed Khan, Hanna Dellago, Lucia Terlecki-Zaniewicz, Michael Karbiener, Sylvia Weilner, Florian Hildner, Viktoria Steininger, Christian Gabriel, Christoph Mück, Pidder Jansen-Dürr, Ara Hacobian, Marcel Scheideler, Regina Grillari-Voglauer, Markus Schosserer, and Johannes Grillari**

**Supplemental Experimental Data Items:**

**Fig. S1 (related to Fig. 2)**

**Knock-down of SNEV downregulates components of signalling pathways involved in adipogenic differentiation and does not interfere with osteogenic differentiation.**

(A) Micro-array based analysis of transcript expression assorted to the KEGG PPAR $\gamma$  signalling pathway is shown as heat map after GSEA. (B) Expression of transcripts assorted to the KEGG insulin signaling pathway is shown as heat map. (C) Expression of transcripts assorted to the KEGG TGF- $\beta$  signaling pathway is shown as heat map. Numbers within cells are log<sub>2</sub>-transformed expression ratios (siSNEV /siControl). The red vertical line denotes the range of this gene set relative to all 3,250 transcripts that could be detected (small heat map). FDR q-value obtained from GSEA is depicted bottom right. (D) *SNEV* mRNA fluctuates during osteogenic differentiation. Osteogenic differentiation of hASCs was induced and *SNEV* mRNA expression was determined by qPCR. (E) hASCs were transfected with siRNA against SNEV or control siRNA, leading to a knockdown of almost 80%. (F) SNEV knockdown does not interfere with osteogenic differentiation of hASCs. Alizarin Red staining for calcium deposition as end-point measurement for siControl (left panel) and siSNEV (right panel) transfected hASCs.

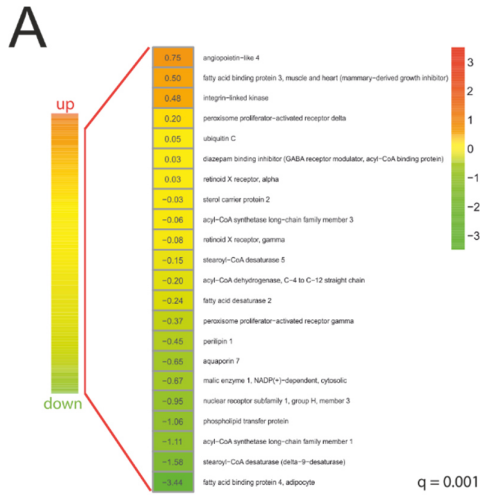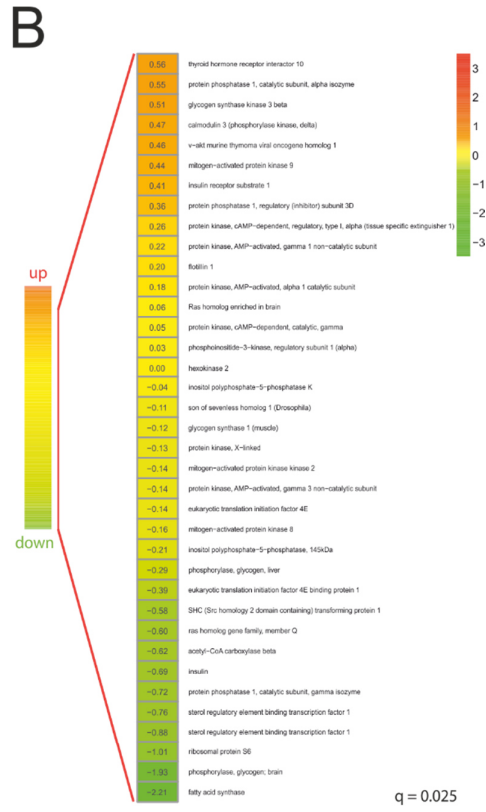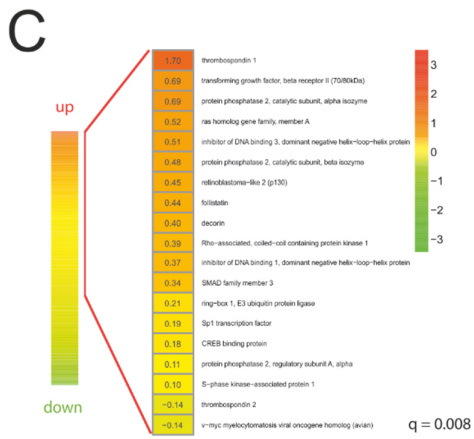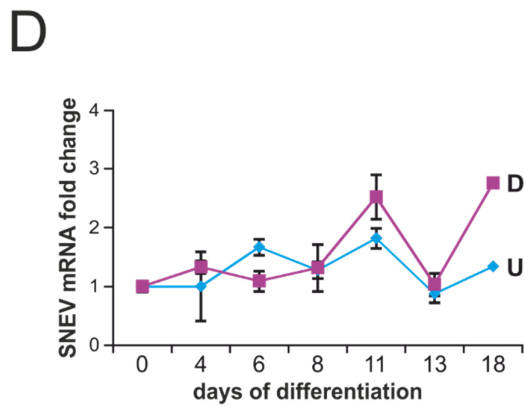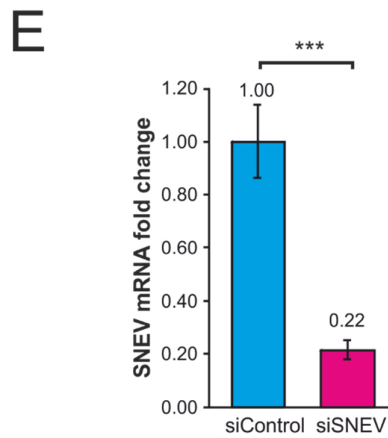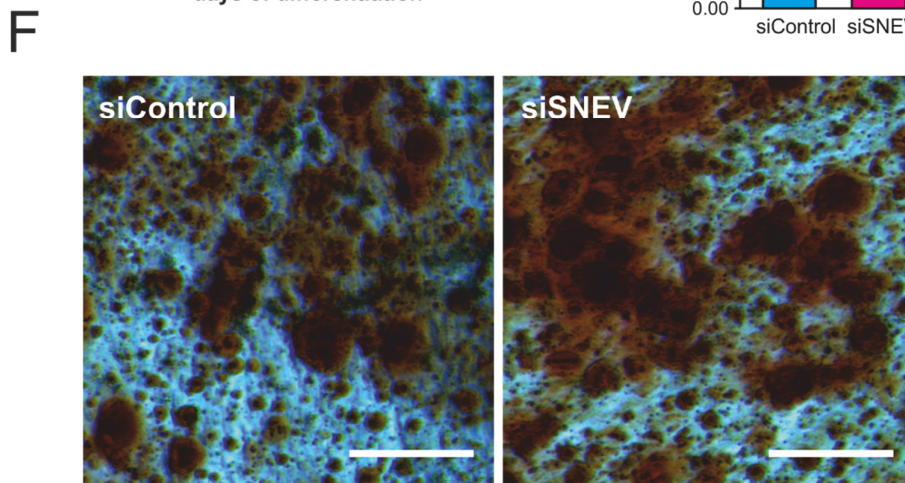

**Fig. S2 (related to Fig. 2)**

**SNEV overexpression accelerates adipogenic differentiation of hASCs.**

**(A)** Schematic representation of experimental design. hASCs were transduced with *SNEV* or empty vector and were sequentially differentiated for 10 days. **(B)** Total RNA isolated at specified time points was subjected to qPCR to analyze *SNEV* mRNA levels to confirm overexpression. The data was normalized to *GAPDH*. N = 4 (four technical replicates from donor 812 are shown. The experiment was repeated twice with cells from the other two other donors with a similar outcome). **(C)** Oil red O staining of intracellular lipids after 6 days of differentiation. Scale bar = 100  $\mu$ m. Exemplary images of cells from donor 812 are shown. **(D)** Intracellular triglyceride levels in transduced hASCs after 6 days of differentiation. The triglyceride content was normalized to total protein content, the mean values of four technical replicates (cells were seeded into four wells of a plate and grown and analysed independently) are shown. Two independent differentiation experiments from two different donors (803 and 812) are shown side-by-side. **(E)** Quantitation of *PPAR $\gamma$*  and **(F)** *FASN* mRNA. N = 4 (four technical replicates from donor 812 are shown. The experiment was repeated twice with cells from the other two other donors with a similar outcome).

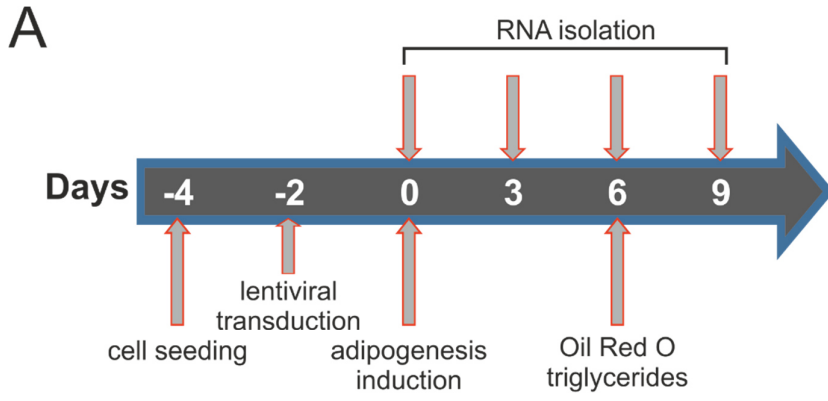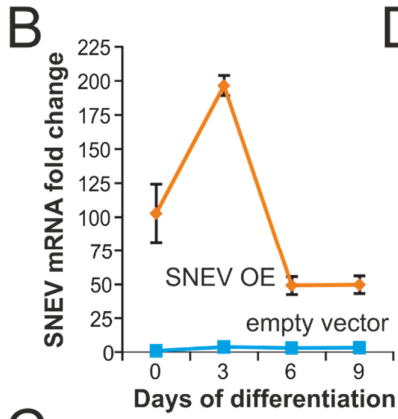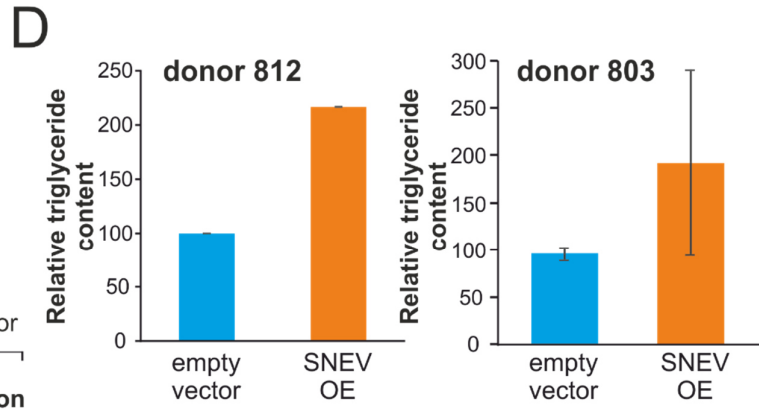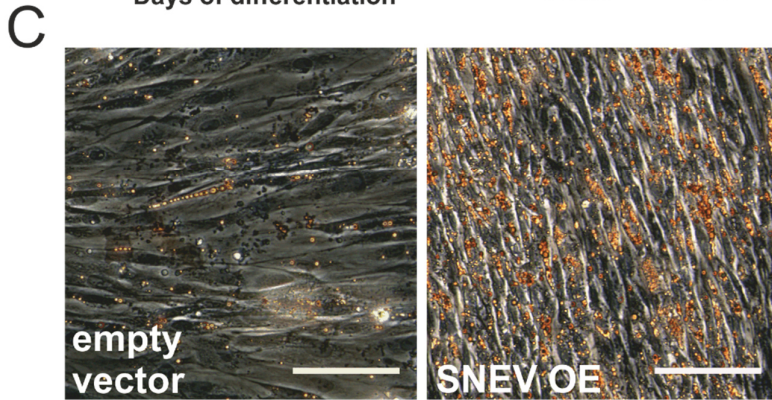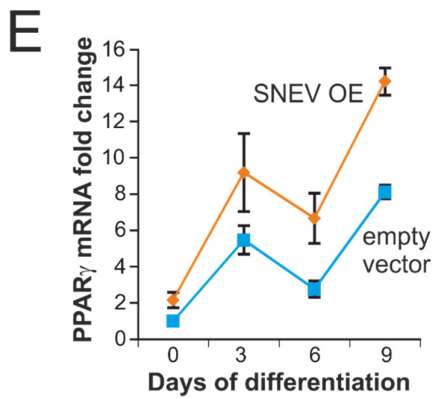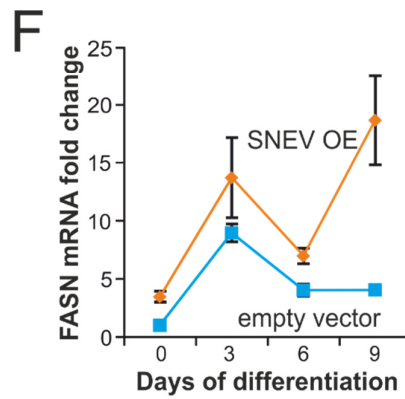

**Fig. S3 (related to Fig. 3)**

**Results of comet assays analysed by two different methods are similar.**

**(A)** hASCs derived from donor 812 were transfected with siRNA targeting *SNEV* mRNA, followed by oxidative stress treatment using 500  $\mu\text{M}$   $\text{H}_2\text{O}_2$  for 90 min and 60 min recovery. DNA damage induced by that treatment was assessed by a comet assay. Cells were classified into three groups according to tail size, representing no, low to medium or high levels of DNA breaks. Representative pictures of cells in category 1 (no or very small tail), category 2 (small to medium size tail) and category 3 (large tail) are shown. Scale bar = 20  $\mu\text{m}$ . **(B)** Separate results for two independent siRNA transfections (both with cells from donor 812) are shown. **(C)** An alternative data analysis based on calculation of tail size using ImageJ yielded similar results as in (B). Pooled data from two replicates are shown. **(D)** Separate results for the two replicates.

A

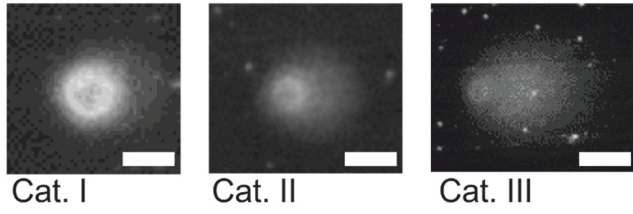

B

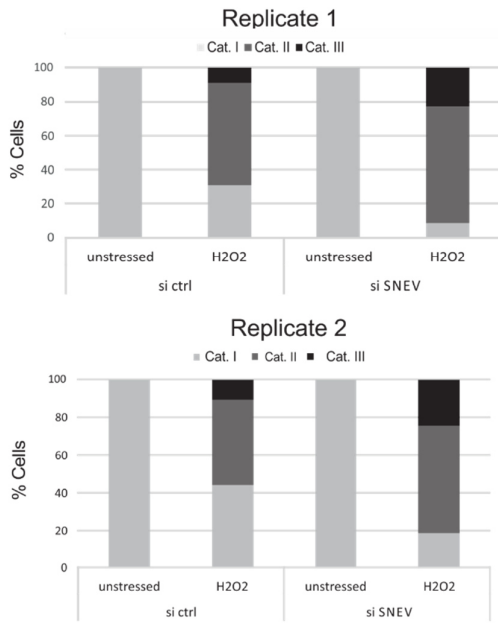

C

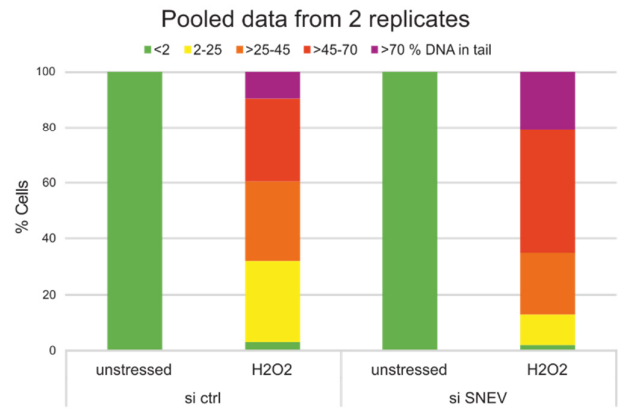

D

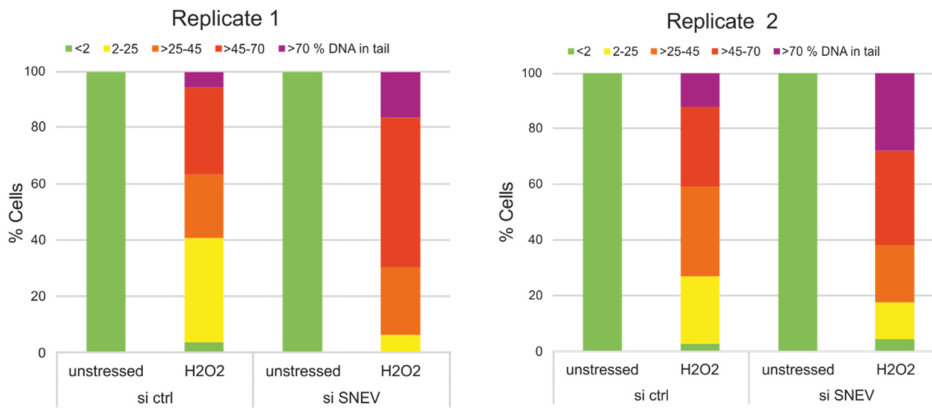

**Fig. S4 (related to Fig. 3)**

**Knock-down of WRN reduces adipogenic differentiation in hASCs.**

(A) Heat map of differentially transcribed genes during adipogenesis. Fold changes were calculated relative to reference day 2. RT-qPCR confirmed regulation of (B) *WRN*, (C) *CSA* and (D) *XPE* during adipogenic differentiation. N = 4 (four technical replicates, the experiment was once repeated independently with cells from a different donor with the same outcome). (E) Knock-down of *WRN*, *CSA*, *XPE* mRNAs was confirmed by qPCR and normalized to *GAPDH*. N = 4 (four technical replicates from one donor are shown. The experiment was repeated twice with cells from two other donors with a similar outcome). (F) Triglyceride content was quantified at day 10 of adipogenic differentiation and normalized to total protein content. N = 4 (cells were seeded into four wells of a plate and grown and analysed independently).



**A**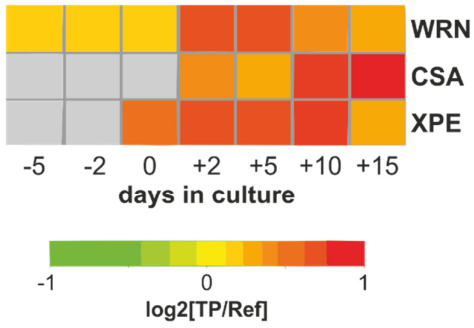**B**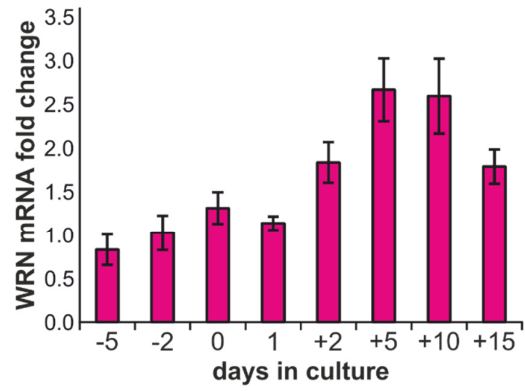**C**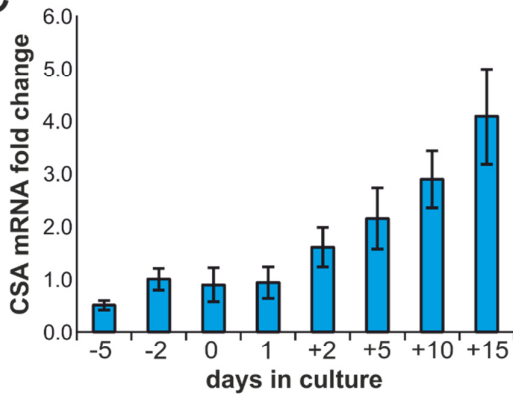**D**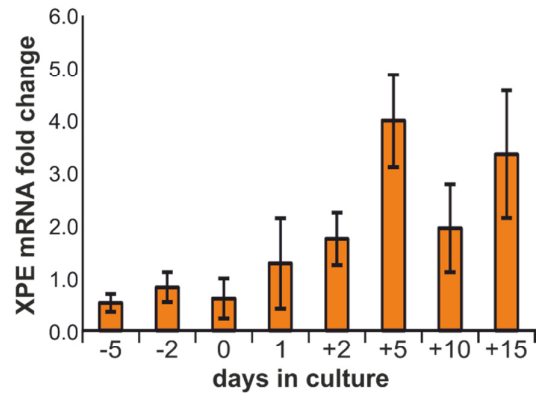**E**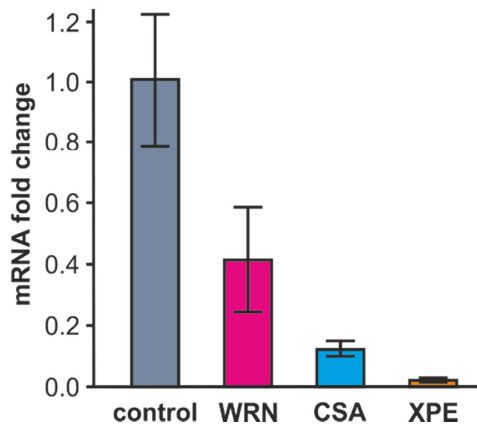**F**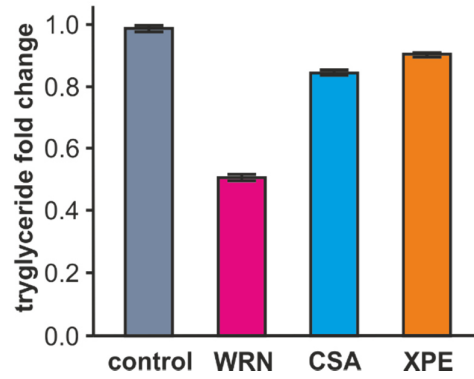

**Table S1 (related to Fig. 2): Significantly enriched gene sets among upregulated and downregulated mRNAs upon SNEV knockdown.**

| gene sets database             | significantly enriched gene sets among UPREGULATED mRNAs  | FDR q-val    |
|--------------------------------|-----------------------------------------------------------|--------------|
| KEGG pathways                  | KEGG_LEUKOCYTE_TRANSENDOTHELIAL_MIGRATION                 | 0.000        |
|                                | KEGG_REGULATION_OF_ACTIN_CYTOSKELETON                     | 0.000        |
|                                | KEGG_FOCAL_ADHESION                                       | 0.001        |
|                                | KEGG_CELL_ADHESION_MOLECULES_CAMS                         | 0.005        |
|                                | KEGG_LYSOSOME                                             | 0.006        |
|                                | KEGG_PATHOGENIC_ESCHERICHIA_COLI_INFECTION                | 0.006        |
|                                | KEGG_ARRHYTHMOGENIC_RIGHT_VENTRICULAR_CARDIOMYOPATHY_ARVC | 0.007        |
|                                | KEGG_HEMATOPOIETIC_CELL_LINEAGE                           | 0.008        |
|                                | KEGG_ECM_RECEPTOR_INTERACTION                             | 0.008        |
|                                | <b>KEGG_TGF_BETA_SIGNALING_PATHWAY</b>                    | <b>0.008</b> |
|                                | KEGG_TIGHT_JUNCTION                                       | 0.008        |
|                                | KEGG_HYPERTROPHIC_CARDIOMYOPATHY_HCM                      | 0.045        |
|                                | KEGG_TOLL_LIKE_RECEPTOR_SIGNALING_PATHWAY                 | 0.058        |
|                                | KEGG_T_CELL_RECEPTOR_SIGNALING_PATHWAY                    | 0.062        |
|                                | KEGG_COLORECTAL_CANCER                                    | 0.064        |
|                                | KEGG_FC_GAMMA_R_MEDIATED_PHAGOCYTOSIS                     | 0.066        |
|                                | KEGG_VIBRIO_CHOLERAE_INFECTION                            | 0.069        |
|                                | KEGG_DILATED_CARDIOMYOPATHY                               | 0.073        |
| KEGG_ADHERENS_JUNCTION         | 0.091                                                     |              |
| KEGG_SMALL_CELL_LUNG_CANCER    | 0.092                                                     |              |
| KEGG_BLADDER_CANCER            | 0.092                                                     |              |
| BP: GO biological process      | ACTIN_FILAMENT_BASED_PROCESS                              | 0.000        |
|                                | ACTIN_CYTOSKELETON_ORGANIZATION_AND_BIOGENESIS            | 0.000        |
|                                | CYTOSKELETON_ORGANIZATION_AND_BIOGENESIS                  | 0.020        |
| CC: GO cellular component      | ACTIN_CYTOSKELETON                                        | 0.000        |
|                                | ER_GOLGI_INTERMEDIATE_COMPARTMENT                         | 0.026        |
|                                | CYTOSKELETON                                              | 0.027        |
|                                | ENDOPLASMIC_RETICULUM                                     | 0.027        |
|                                | MEMBRANE_FRACTION                                         | 0.048        |
|                                | INTEGRAL_TO_MEMBRANE                                      | 0.050        |
|                                | INTRINSIC_TO_MEMBRANE                                     | 0.053        |
|                                | CELL_FRACTION                                             | 0.053        |
|                                | ENDOPLASMIC_RETICULUM_PART                                | 0.055        |
|                                | EXTRACELLULAR_REGION_PART                                 | 0.057        |
|                                | MEMBRANE                                                  | 0.057        |
|                                | PLASMA_MEMBRANE                                           | 0.058        |
|                                | EXTRACELLULAR_REGION                                      | 0.059        |
|                                | ENDOMEMBRANE_SYSTEM                                       | 0.063        |
|                                | GOLGI_APPARATUS                                           | 0.069        |
|                                | MEMBRANE_PART                                             | 0.070        |
|                                | CYTOSKELETAL_PART                                         | 0.071        |
|                                | PROTEINACEOUS_EXTRACELLULAR_MATRIX                        | 0.072        |
| ENDOPLASMIC_RETICULUM_MEMBRANE | 0.074                                                     |              |
| EXTRACELLULAR_MATRIX           | 0.075                                                     |              |
| CELL_PROJECTION                | 0.082                                                     |              |
| CYTOPLASMIC_PART               | 0.087                                                     |              |
| CELL_CORTEX                    | 0.087                                                     |              |
| PLASMA_MEMBRANE_PART           | 0.096                                                     |              |
| MF: GO molecular function      | CYTOSKELETAL_PROTEIN_BINDING                              | 0.004        |
|                                | ACTIN_BINDING                                             | 0.010        |
|                                | PEPTIDE_BINDING                                           | 0.024        |
|                                | NUCLEOSIDE_TRIPHOSPHATASE_ACTIVITY                        | 0.027        |
|                                | HYDROLASE_ACTIVITY_ACTING_ON_ACID_ANHYDRIDES              | 0.034        |
|                                | ATPASE_ACTIVITY_COUPLED                                   | 0.057        |
|                                | ATPASE_ACTIVITY                                           | 0.091        |
| GTPASE_ACTIVITY                | 0.091                                                     |              |
| Reactome pathway database      | REACTOME_HEMOSTASIS                                       | 0.003        |
|                                | REACTOME_AXON_GUIDANCE                                    | 0.005        |
|                                | REACTOME_CELL_SURFACE_INTERACTIONS_AT_THE_VASCULAR_WALL   | 0.051        |
| transcription factor targets   | CCAWWNAAGG_V\$SRF_Q4                                      | 0.004        |

| gene sets database                 | significantly enriched gene sets among DOWNREGULATED mRNAs                                                     | FDR q-val |
|------------------------------------|----------------------------------------------------------------------------------------------------------------|-----------|
| KEGG pathways                      | KEGG_RIBOSOME                                                                                                  | 0.000     |
|                                    | KEGG_PPAR_SIGNALING_PATHWAY                                                                                    | 0.001     |
|                                    | KEGG_INSULIN_SIGNALING_PATHWAY                                                                                 | 0.025     |
| BP: GO biological process          | CELLULAR_BIOSYNTHETIC_PROCESS                                                                                  | 0.000     |
|                                    | BIOSYNTHETIC_PROCESS                                                                                           | 0.000     |
| CC: GO cellular component          | RIBONUCLEOPROTEIN_COMPLEX                                                                                      | 0.080     |
| MF: GO molecular function          | OXIDOREDUCTASE_ACTIVITY_GO_0016616                                                                             | 0.085     |
|                                    | REACTOME_3_UTR_MEDIATED_TRANSLATIONAL_REGULATION                                                               | 0.000     |
| Reactome pathway database          | REACTOME_FORMATION_OF_THE_TERNARY_COMPLEX_AND_SUBSEQUENTLY_THE_43S_COMPLEX                                     | 0.000     |
|                                    | REACTOME_ACTIVATION_OF_THE_MRNA_UPON_BINDING_OF_THE_CAP_BINDING_COMPLEX_AND_EIFS_AND_SUBSEQUENT_BINDING_TO_43S | 0.000     |
| transcription factor targets       | no significantly (q<0.1) enriched gene sets                                                                    |           |
| chemical and genetic perturbations | BHAT1_G2M_ARREST_BY_2METHOXYESTRADIOL_DN                                                                       | 0.036     |
|                                    | ABE_INNER_EAR                                                                                                  | 0.081     |

**Table S2 (related to Experimental Procedures): Donor information**

hASCs were isolated by liposuction. Basic information on the donors is provided.

| <b>Donor Number</b>        | <b>803</b> | <b>812</b>        | <b>851</b> |
|----------------------------|------------|-------------------|------------|
| <b>Gender</b>              | female     | female            | female     |
| <b>Age (years)</b>         | 45         | 39                | 25         |
| <b>Site of liposuction</b> | femoral    | femoral/abdominal | femoral    |
| <b>BMI</b>                 | 30.6       | 31.5              | 26.9       |

**Table S3 (related to Experimental Procedures): Characterization of hASCs**

Typical markers of mesenchymal (CD73, CD90, CD105 and HLA-ABC) and hematopoietic (CD14, CD34, CD45 and HLA-DR) stem cells were analyzed by flow cytometry. The percentage of cells positive for each of the markers is shown.

| <b>Donor</b>                | <b>803</b> | <b>812</b> | <b>851</b> |
|-----------------------------|------------|------------|------------|
| <b>CD73 [% positive]</b>    | 99.23      | 95.23      | 99.88      |
| <b>CD90 [% positive]</b>    | 99.27      | 80.55      | 99.91      |
| <b>CD105 [% positive]</b>   | 91.12      | 99.68      | 98.84      |
| <b>HLA-ABC [% positive]</b> | 94.72      | 97.57      | 97.54      |
| <b>CD14 [% positive]</b>    | 1.03       | 0.86       | 1.5        |
| <b>CD34 [% positive]</b>    | 4.96       | 1.25       | 1.03       |
| <b>CD45 [% positive]</b>    | 1.95       | 1.19       | 0.95       |
| <b>HLA-DR [% positive]</b>  | 1.87       | 0.75       | 0.73       |

**Table S4 (related to Experimental Procedures): Primers used in this study**

Sequences of primers used in this study are provided.

| <b>Gene name</b>               | <b>Forward primer</b>   | <b>Reverse primer</b>   |
|--------------------------------|-------------------------|-------------------------|
| <b>SNEV</b>                    | TCATTGCCCGTCTCACCAAG    | GGCACAGTCTTCCCTCTCTTC   |
| <b>PPAR<math>\gamma</math></b> | AGCCTGCGAAAGCCTTTTGGTGA | GCAGTAGCTGCACGTGTTCCGT  |
| <b>FASN</b>                    | AACTTGCAGGAGTTCTGGGAC   | TGAATCTGGGTTGATGCCTCCG  |
| <b>GAPDH</b>                   | TGTGAGGAGGGGAGATTCAG    | CGACCACTTTGTCAAGCTCA    |
| <b>WRN</b>                     | GTGGCGCTCCACAGTCAT      | TCTCCGAACACATGCCTTTC    |
| <b>CSA</b>                     | GAGGACACGATATGCTGGGG    | CCAGTCCCAAAACTCTCCGT    |
| <b>XPE</b>                     | AAGAAACGCCCAGAAACCCA    | ACATCTTCTGCTAGGACCGGA   |
| <b>prp-19 (C. elegans)</b>     | TCGTGTGCGGAATCAGTGGTGA  | TGGTGCTGATCCAGTGCCGC    |
| <b>wrn-1 (C. elegans)</b>      | AGGAAGACACTTTGGTGGACCT  | ACCAAATGCAACTGTCGCAACGA |
| <b>xpa-1 (C. elegans)</b>      | TGCAGGAACGTCGCGAGCAA    | TGCGCAGATCCAGATCGCAA    |
| <b>M18.5 (C. elegans)</b>      | CTCGCTGAGTTCCAGCGCCT    | CCATTGGAATCGAGCGAACGTGG |
| <b>act-1 (C. elegans)</b>      | CTACGAACTTCTGACGGACAAG  | CCGGCGGACTCCATAACC      |

## **Supplemental Experimental Procedures:**

### **Adipogenic differentiation**

14,000 hASCs were seeded into 1.9 cm<sup>2</sup> plates in growth medium two days prior to adipogenic induction. Adipogenesis was induced by adding DMEM high glucose (GE Healthcare) supplemented with 549 μM 3-Isobutyl-1-methylxanthine (Sigma), 1 μM Dexamethasone (Sigma), 549 nM hydrocortisone (Sigma), 66 μM Indomethacin (Sigma). Medium was exchanged twice per week. Undifferentiated control hASCs were grown in DMEM high glucose/Ham's F12 (GE Healthcare), supplemented with 10% FCS, 4 mM L-Glutamine and 0.1 ng/ml β-FGF (R&D systems). Total RNA and protein were isolated at specified time points during differentiation. Triglycerides were quantified by Infinity Triglyceride quantification kit (ThermoScientific) according to the manufacturer's recommended protocol and normalized to total protein concentration, as measured using the BCA kit (ThermoScientific).

Oil red O staining of hASCs was performed on day 10 of differentiation. Medium was removed, cells were washed twice with PBS, and fixed by incubating in 3.6% formaldehyde in PBS for 1 h at room temperature. Cells were then washed twice for 5 min with PBS for 5 min, incubated and fixed with 70% ethanol for 2 min followed by 10 min incubation in Oil red O working solution (1.8 mg/ml, Sigma). Cells were washed with PBS until all visible traces of dye were removed. Pictures were taken on a Leica DM IL LED Inverted Microscope with a 10x dry objective (Leica Microsystems).

### **Osteogenic differentiation**

2,000 hASCs were seeded into 1.9 cm<sup>2</sup> plates 72 hours prior to induction of osteogenesis. 72 h post seeding, osteogenesis was induced by low glucose DMEM (GE Healthcare) supplemented with 10% FCS, 4 mM L-Glutamine, 10 mM L-Glycerophosphate (Sigma), 150 μM Ascorbate-2-phosphate (Sigma), 10 nM vitamin-D3 (Sigma), 10 nM Dexamethasone (Sigma) and 100 μg/ml Primocin. hASCs grown in DMEM low glucose/Ham's F12, 1:1 (PAA) supplemented with 10% FCS, 4 mM L-Glutamine and 1x Primocin were used as control. The medium was replaced every third day until day 12. Osteogenic differentiation was assessed by Alizarin Red staining.

To perform Alizarin Red staining, medium was removed and cells were washed thrice with PBS, fixed with 70% ethanol for 1 h at -20 °C, washed again thrice with PBS, and incubated for 10 min with gentle shaking with Alizarin Red solution (200 mg/ml, Applichem). Cells were washed with PBS until all visible traces of the dye were removed. Pictures were taken on a Leica DM IL LED Inverted Microscope with a 10x dry objective.

### **Antibodies for Western Blot**

Prp19/Pso4 rabbit polyclonal antibody was from Bethyl Laboratories (Montgomery, TX, USA) #A300-102A. As loading controls, β-Actin mouse monoclonal antibody from Sigma-Aldrich (St.Louis, MO, USA; #A-5441), and GAPDH rabbit antibody FL-335 from Santa Cruz (Santa Cruz, CA, USA; #sc-25778) were used.

### **Immunofluorescence**

Cells were washed twice with PBS and fixed in 4% formaldehyde in PBS for 20 min at room temperature. After washing with PBS, cells were permeabilized in 0.25% Triton in PBS for 20 min and blocked in 20% FCS in PBS for 1 h. Cells were washed thrice with PBS and stained with anti-Prp19 antibody (Bethyllab) diluted 1:500 in PBS containing 20% FCS for 1 h. Cells were again washed with PBS prior to application of Dyelight 649 anti-rabbit antibody (Jackson ImmunoResearch) diluted 1:500 in PBS containing 20% FCS for 1 h, followed by three washes with PBS. Nuclei were counterstained with DAPI (200 ng/ml). Slides were mounted with Vectashield mounting medium (Vector Laboratories) and sealed with nail polish. Microscopy and image analysis were performed on a Leica SP5 II laser scanning confocal microscope.

### **Comet Assays**

DNA was stained with 0.5  $\mu\text{g/ml}$  DAPI for 10 min. Between 69 and 500 randomly selected cells per slide were examined for the presence or absence of comets using fluorescence microscopy. The cells were assigned to three different categories according to their tail size. Percentage of cells in each category was calculated for two biological replicates separately and for pooled data. To evaluate analysis by visual inspection, comets were analysed by measuring integrated density of DAPI signal in comet heads and entire comets using ImageJ and calculating % DNA in comet tails after subtracting the background fluorescence from a neighboring dark area of equivalent size. To assess DNA damage accumulation during adipogenic differentiation, undifferentiated hASCs were transfected with siSNEV and control siRNA and induced to differentiate 48 h post transfection as described. Comet assays were carried out using differentiated and undifferentiated cells, as described.

### ***C. elegans* strains**

Strains used in this work include N2 (provided by V. Jantsch) and CF1814 [*rrf-3(pk1426)* II, *daf-2(e1370)* III]. All strains are available through the Caenorhabditis Genetics Center (CGC).

### **RNA interference in *C. elegans***

The HT115 strain of *E. coli* carrying the RNAi-construct or the empty vector (L4440) as control, was cultured overnight in liquid LB medium with ampicillin and tetracyclin at 37 °C. The bacteria were harvested by centrifugation, re-suspended in LB to a concentration of 60 mg/ml and 200  $\mu\text{l}$  of this suspension was seeded on NGM plates containing 1 mM IPTG and 25  $\mu\text{g/ml}$  Carbenicillin. Plates were incubated at 37 °C overnight and used within one week.
