# Supplementary material for: SNEVhPrp19/hPso4 Regulates Adipogenesis of Human Adipose Stromal Cells
Source: PubMed Central journal article supplement — Stem Cell Reports. 2016 Dec 29;8(1):21–9. doi: 10.1016/j.stemcr.2016.12.001 (PMC5233435; doi:10.1016/j.stemcr.2016.12.001), 2016-12-29
Supplement: mmc2.pdf [file mmc2.pdf]

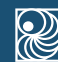SNEV<sup>hPrp19/hPso4</sup> Regulates Adipogenesis of Human Adipose Stromal Cells

Abdulhameed Khan,<sup>1,2</sup> Hanna Dellago,<sup>1,3</sup> Lucia Terlecki-Zaniewicz,<sup>1,3</sup> Michael Karbiener,<sup>4</sup> Sylvia Weilner,<sup>1,5</sup> Florian Hildner,<sup>5,6</sup> Viktoria Steininger,<sup>1</sup> Christian Gabriel,<sup>5,6</sup> Christoph Mück,<sup>7</sup> Pidder Jansen-Dürr,<sup>7</sup> Ara Hacobian,<sup>5,8</sup> Marcel Scheideler,<sup>9,10,11,12</sup> Regina Grillari-Voglauer,<sup>1,5</sup> Markus Schosserer,<sup>1,5,\*</sup> and Johannes Grillari<sup>1,3,5,\*</sup>

<sup>1</sup>Department of Biotechnology, BOKU -University of Natural Resources and Life Sciences, Vienna, 1190 Vienna, Austria

<sup>2</sup>Department of Bioinformatics and Biotechnology of Faculty of Basic and Applied Sciences, International Islamic University, 44000 Islamabad, Pakistan

<sup>3</sup>Christian Doppler Laboratory on Biotechnology of Skin Aging, 1190 Vienna, Austria

<sup>4</sup>Department of Phoniatrics, ENT University Hospital, Medical University of Graz, 8036 Graz, Austria

<sup>5</sup>Austrian Cluster for Tissue Regeneration, 1200 Vienna, Austria

<sup>6</sup>Red Cross Blood Transfusion Service of Upper Austria, 4017 Linz, Austria

<sup>7</sup>Research Institute for Biomedical Aging Research, Center for Molecular Biosciences (CMBI), University of Innsbruck, 6020 Innsbruck, Austria

<sup>8</sup>Ludwig Boltzmann Institute for Experimental and Clinical Traumatology, AUVA Research Center, 1200 Vienna, Austria

<sup>9</sup>Institute for Diabetes and Cancer (IDC), Helmholtz Zentrum München, German Research Center for Environmental Health, 85764 Neuherberg, Germany

<sup>10</sup>Joint Heidelberg-IDC Translational Diabetes Program, Heidelberg University Hospital, 69120 Heidelberg, Germany

<sup>11</sup>Molecular Metabolic Control, Medical Faculty, Technical University Munich, 80333 Munich, Germany

<sup>12</sup>German Center for Diabetes Research (DZD), 85764 Neuherberg, Germany

\*Correspondence: [markus.schosserer@boku.ac.at](mailto:markus.schosserer@boku.ac.at) (M.S.), [johannes.grillari@boku.ac.at](mailto:johannes.grillari@boku.ac.at) (J.G.)

<http://dx.doi.org/10.1016/j.stemcr.2016.12.001>

## SUMMARY

Aging is accompanied by loss of subcutaneous adipose tissue. This may be due to reduced differentiation capacity or deficiency in DNA damage repair (DDR) factors. Here we investigated the role of SNEV<sup>hPrp19/hPso4</sup>, which was implicated in DDR and senescence evasion, in adipogenic differentiation of human adipose stromal cells (hASCs). We showed that SNEV is induced during adipogenesis and localized both in the nucleus and in the cytoplasm. Knockdown of SNEV perturbed adipogenic differentiation and led to accumulation of DNA damage in hASCs upon oxidative stress. In addition, we demonstrated that SNEV is required for fat deposition in *Caenorhabditis elegans*. Consequently, we tested other DDR factors and found that WRN is also required for adipogenesis in both models. These results demonstrate that SNEV regulates adipogenesis in hASCs and indicate that DDR capacity in general might be a pre-requisite for this process.

## INTRODUCTION

Adipose tissue is formed at specific locations as a major energy storage compartment and is an important source of signaling activity. The distribution of adipose reservoirs within the body undergoes major changes during normal aging (Caso et al., 2013), while excess or dysfunctional fat tissue leads to reduced lifespan and accelerates the onset of age-related diseases (Ahima, 2009; Muzumdar et al., 2008). Moreover, loss of subcutaneous fat and increased visceral adiposity is observed in patients with segmental progeroid syndromes such as Werner syndrome (Mori et al., 2001), Cockayne syndrome, or trichothiodystrophy. These diseases, mirroring certain aspects of accelerated aging, are characterized by mutations in DNA damage repair (DDR) factors, leading to accumulation of DNA damage over time and hence potentially to reduced proliferation and differentiation or to senescence of pre-adipocytes (Tchkonia et al., 2010). Mouse models deficient in DNA repair also show adipose tissue degeneration (Karakasilioti et al., 2013). However, it remains unclear whether DNA repair factors themselves have an impact on adipogenic differentiation of human adipose stromal cells (hASCs).

WRN and SNEV<sup>hPrp19/hPso4</sup> are members of a DDR protein complex (Zhang et al., 2005) and are involved in adipogen-

esis of mouse 3T3-L1 cells (Cho et al., 2007; Turaga et al., 2009). WRN is a helicase required for DNA recombination and repair and interacts with the SNEV complex during repair of interstrand crosslinks (Zhang et al., 2005). However, due to differences in the murine and human adipogenic differentiation processes (Mikkelsen et al., 2010), the impact of the human homologs on adipogenesis is still unclear.

SNEV<sup>hPrp19/hPso4</sup>, termed SNEV in the following, is highly conserved from yeast to humans and plays a role in several cellular pathways. It is an essential splicing factor (Grillari et al., 2005), possesses E3 ubiquitin ligase activity (Song et al., 2010), and interacts with the proteasome (Löscher et al., 2005). In addition, SNEV is involved in various types of DDR, such as DNA double-strand break repair (Mahajan and Mitchell, 2003) and homologous recombination (Abbas et al., 2014). It also interacts with two major DDR regulators: ataxia-telangiectasia mutated regulator phosphorylates SNEV after exposure to oxidative stress (Dellago et al., 2012), and SNEV contributes to the activation Rad3-related (ATR) regulator (Wan and Huang, 2014). SNEV is also linked to cellular senescence (Voglauer et al., 2006) and skin aging (Monteforte et al., 2016).

Here we show that SNEV indeed regulates adipogenesis in human cells and that these findings can be extended

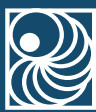

to other factors that counteract DNA damage during adipogenic differentiation of hASCs. This suggests that the ability to repair DNA might represent a checkpoint for adipogenesis and thereby provides a failsafe mechanism to reduce the risk of accumulating damaged and/or senescent cells with a pro-inflammatory phenotype in the adipose tissue.

## RESULTS

### **SNEV Expression Is Induced during Adipogenesis**

We analyzed *SNEV* expression on mRNA and protein level during adipogenic differentiation of hASCs at various time points. Adipogenic differentiation was confirmed by oil red O staining after 10 days. Indeed, *SNEV* mRNA (Figure 1A) as well as protein levels (Figure 1B) increased in a time-dependent manner over 9 days, in line with adipogenic markers *PPAR* $\gamma$  and *FASN* (Figures 1C and 1D). In addition, we observed changes in the cellular localization of *SNEV* from mainly nuclear in undifferentiated controls to also cytoplasmic in differentiated cells (Figure 1E).

### **SNEV Regulates Adipogenic Differentiation of hASCs by Modulating *PPAR* $\gamma$ and Insulin Signaling**

To determine whether *SNEV* is not only regulated, but also necessary for adipogenic differentiation, hASCs were transfected with a small interfering RNA (siRNA) pool against *SNEV* (si*SNEV*) or a non-targeting control siRNA pool (siControl), and differentiation was induced 48 hr post-transfection (Figure 2A). si*SNEV* transfection resulted in a 90% knockdown of *SNEV* mRNA over the entire period of differentiation (Figure 2B). Indeed, this knockdown resulted in formation of fewer lipid droplets in comparison with control, as shown by oil red O staining (Figure 2C) and intracellular triglyceride content (Figure 2D).

To investigate how *SNEV* might inhibit adipogenesis, we performed microarray analysis at day 3 of adipogenic differentiation in response to *SNEV* knockdown (Figure 2E). Thereby, 163 genes with at least 2-fold differential expression in si*SNEV* versus siControl were identified. Then, we performed gene-set-enrichment analysis and found that genes involved in the pro-adipogenic *PPAR* $\gamma$  (Figures 2F and S1A) and insulin signaling (Figures 2F and S1B) pathways were downregulated, whereas genes involved in the anti-adipogenic transforming growth factor  $\beta$  pathway (Figures 2F and S1C) were upregulated, among others (see also Table S1). We further confirmed the microarray data by qPCR of *PPAR* $\gamma$  (Figure 2G) and *FASN* (Figure 2H). Collectively, these data suggest that *SNEV* is necessary at an early step of adipogenesis, as it inhibits global changes

of gene transcription that are usually induced by the differentiation process.

Our findings are corroborated by the observation that overexpression of *SNEV* in hASCs resulted in accelerated adipogenic differentiation (Figure S2). However, this finding strongly depended on the donor-specific differentiation propensity and on the construct used, hence on the precise degree of overexpression. Notably, *SNEV* overexpression had no inhibitory effect on adipogenesis in any case, while knockdown resulted in reduced lipid droplet accumulation in all cases. In addition, we did not observe obvious effects on osteogenic differentiation (Figures S1D–S1F), which is often seen to increase at the expense of adipogenic differentiation (James, 2013).

### **SNEV Is Required for Functional DDR in hASCs**

To prove that *SNEV* is involved also in DNA repair in ASCs, we knocked down *SNEV* (Figure 3A) and exposed ASCs to reactive oxygen species (ROS) which arise during adipogenesis. DNA damage was assessed by comet assay. Representative images of comet assays are shown in Figure 3B. The resulting comets were quantified by comparing the fluorescence intensity in the head versus the tail as a measure of nuclear DNA damage (Guo et al., 2013) and classified into four categories. Only low levels of DNA damage were detectable without  $H_2O_2$  treatment in both si*SNEV*- and siControl-transfected cells. In contrast, upon  $H_2O_2$  treatment, *SNEV* knockdown led to a marked increase of cells with high levels of DNA damage compared with siControl (Figure 3C). Manual classification into three categories according to the tail size gave highly similar results (Figure S3). Hence, *SNEV* is required for DNA repair after free radical damage in hASCs.

To examine whether *SNEV* is necessary to prevent intrinsic DNA damage caused by ROS arising during adipogenic differentiation, we knocked down *SNEV* in hASCs (Figures 3D and 3E), induced adipogenic differentiation, and monitored formation of ROS and accumulation of DNA damage. On days 8 and 11, we observed elevated ROS levels in differentiating cells, independent of *SNEV* mRNA levels (Figure 3F). However, comet assays showed a significant increase of DNA damage in si*SNEV* versus control cells at day 11 of adipogenic differentiation (Figure 3G). Hence, *SNEV* does not interfere with ROS production during adipogenic differentiation of ASCs, but is required for efficient repair of the DNA damage inflicted by emerging ROS.

To test if the ability to modulate adipogenic differentiation is restricted to *SNEV* or a general property of DDR factors, we tested if genes mutated in segmental progeroid syndromes influence adipogenesis as well. First, we specifically visualized the expression of genes involved in DDR using existing transcriptomic data of an adipogenic

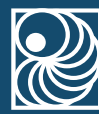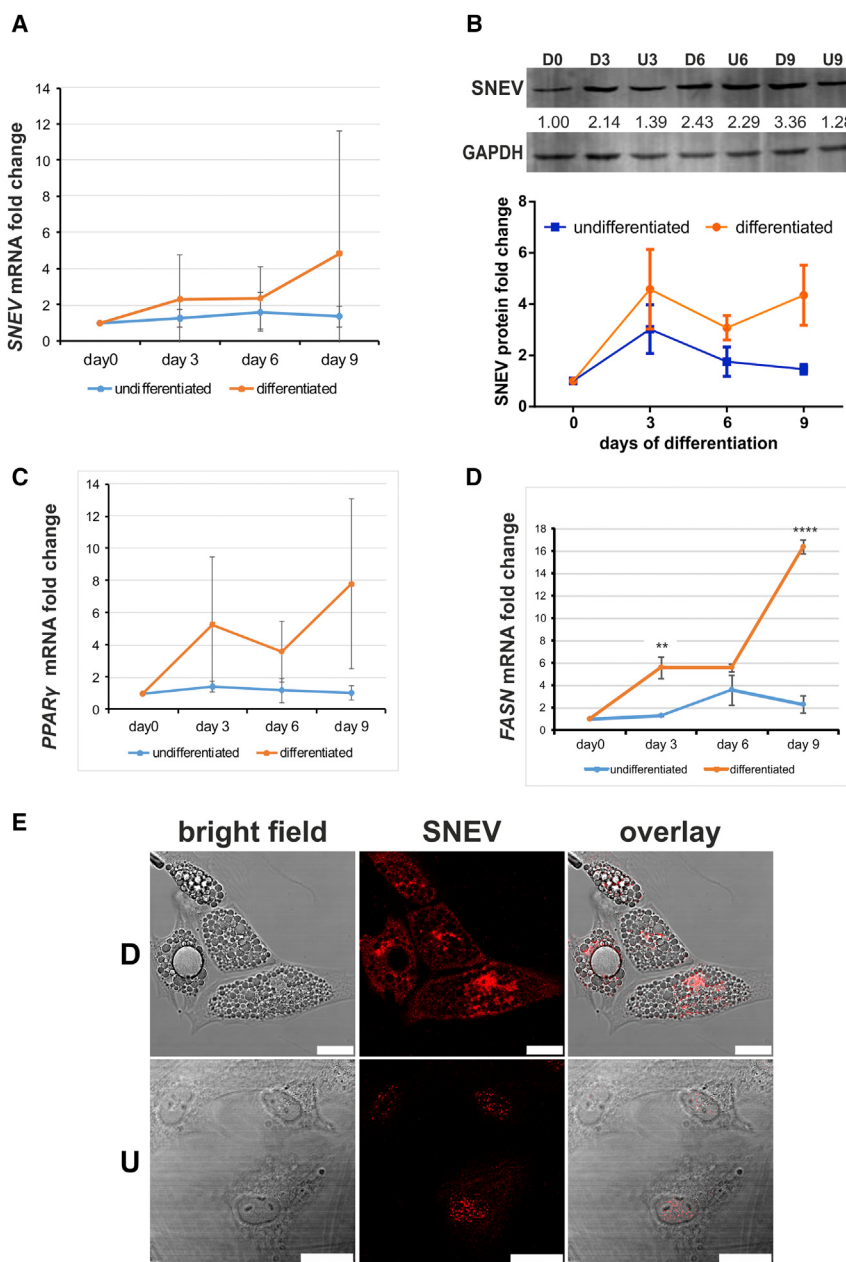

**Figure 1. Expression of SNEV Is Induced during Adipogenesis**

(A) *SNEV* mRNA expression in hASCs at different days post-induction of adipogenesis was quantified by RT-qPCR. Data points represent averages from three independent differentiation experiments (donors 803, 812, and 851). Error bars indicate SD. Two-way ANOVA p value of 0.045.

(B) Whole-cell lysate of differentiating (D) and undifferentiated (U) hASCs were submitted to western blotting and probed with anti-SNEV antibody. Anti-GAPDH was used to ensure equal loading. Numbers represent intensities of bands normalized to GAPDH. Upper panel, exemplary western blot. Lower panel, the graph shows average of band intensities normalized to GAPDH derived from three independent differentiation experiments (donors 803, 812, and 851). Error bars indicate SD. Two-way ANOVA p value of 0.032. (C and D) Adipogenic differentiation was confirmed by qPCRs against adipogenic marker genes *PPAR $\gamma$*  and *FASN*. Data points represent the average from three independent differentiation experiments (donors 803, 812, and 851). Error bars indicate SD. Unpaired two-sided Student's t tests were performed to compare differentiated and undifferentiated samples at the same time points: \*\*\*\*p < 0.0001, \*\*p < 0.01.

(E) Differentiated (D) and undifferentiated (U) hASCs of donor 812 were stained with anti-SNEV antibody. Scale bar, 25  $\mu$ m.

differentiation time-course experiment (available at Gene Expression Omnibus, accession number GEO: GSE64845). From these, we selected *WRN*, *CSA*, and *XPE* for further analysis (Figures S4A–S4D). Mutations of these genes mirror aspects of accelerated aging and represent different DDR pathways, *CSA* being specific for transcription-coupled nucleotide excision repair (TC-NER), while *XPE* is involved in global genome- and TC-NER, as well as in homologous recombination. We knocked down *WRN*, *CSA*, and *XPE* in hASCs by siRNA transfection and induced adipogenesis. Knockdown was confirmed by qPCR (Figure S4E), and

adipogenic differentiation was assessed by intracellular triglyceride accumulation at day 10 of differentiation. *CSA* and *XPE* knockdown reduced intracellular triglycerides slightly, but not statistically significantly, whereas *WRN* knockdown resulted in a significant reduction by 50% (Figure S4F).

#### Loss of SNEV and WRN Lead to Reduced Fat Deposition in *C. elegans*

To test the functional conservation of the DDR factors SNEV, *WRN*, *CSA*, and *XPE* in adipogenesis, we assessed

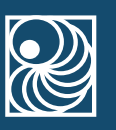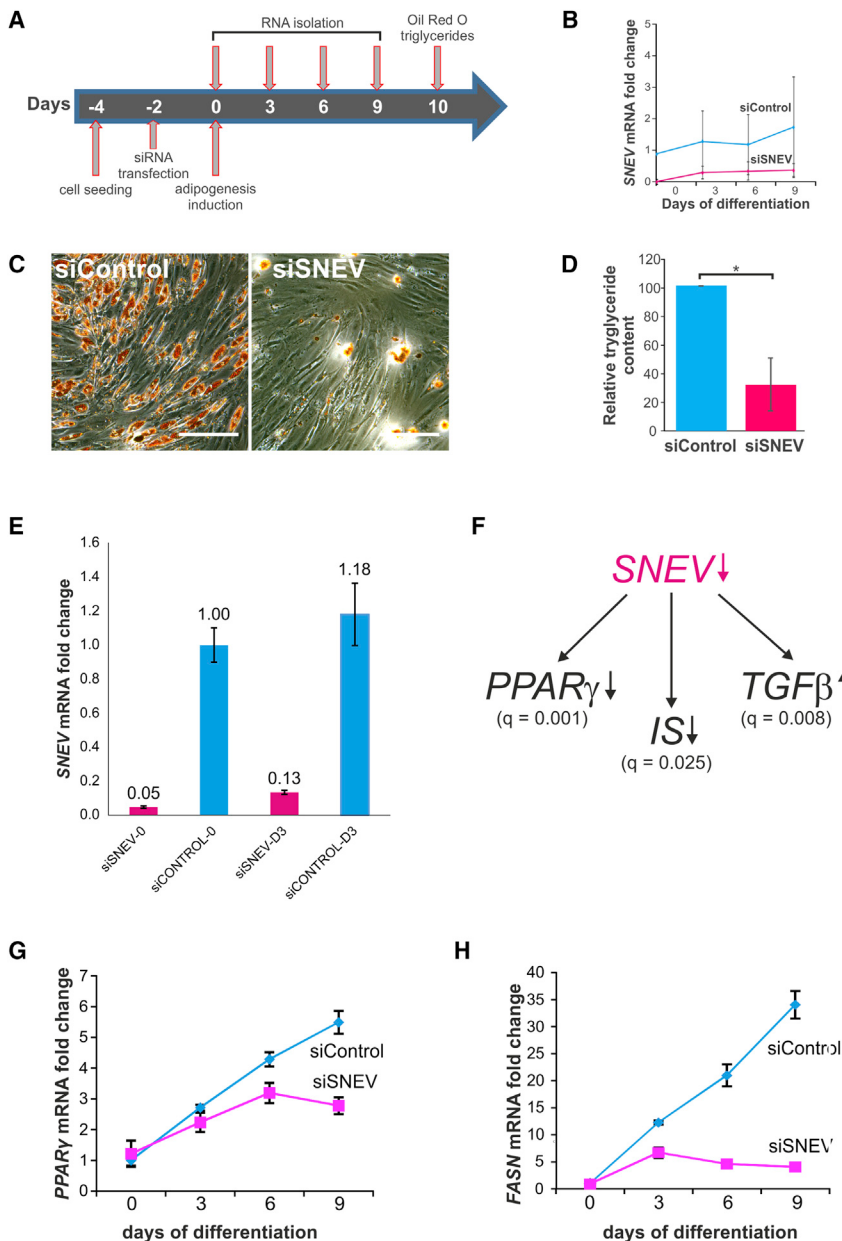

**Figure 2. Knockdown of SNEV Inhibits Adipogenic Differentiation of hASCs by Downregulating Adipogenesis-Promoting Signaling Pathways**

(A) Schematic representation of experimental design.

(B) Expression of *SNEV* mRNA during adipogenic differentiation after siSNEV or siControl transfection. Data points represent averages from four independent differentiation experiments (1× donor 803, 2× donor 812, and 1× donor 851). Error bars indicate SD. Two-way ANOVA p value < 0.001.

(C) Oil red O staining for triglyceride content in transfected hASCs after 10 days of differentiation. Scale bar, 100 μm.

(D) Intracellular triglyceride levels at day 10 of differentiation. Triglyceride content was normalized to total protein content and to the control. An unpaired two-sided Student's t tests without assuming homogeneity of variances was performed: \*p < 0.05. Data points represent average from three independent differentiation experiments (donors 803, 812, and 851). Error bars indicate SD.

(E) RT-qPCR to determine knockdown efficiency in RNA samples subjected to microarrays. Numbers represent the day of harvest. The average of four technical replicates of cells from donor 812 is shown. Error bars indicate SD. Results with cells from donor 803 were similar.

(F) Microarray analysis of transcript expression after *SNEV* knockdown revealed a downregulation of the pro-adipogenic *PPARγ* and insulin signaling (*IS*) pathways and an upregulation of the anti-adipogenic transforming growth factor β (*TGF-β*) signaling pathway. q Values obtained from gene-set-enrichment analysis are depicted. The analysis was performed on two independent experiments with cells from two different donors (803 and 812).

their role in fat deposition in *C. elegans*. For this purpose, we selected *prp-19*, *wrn-1*, *M18.5*, and *xpa-1* as orthologs of the human DDR factors *SNEV*, *WRN*, *XPE*, and *XPA*. Since we did not detect major differences in developmental timing between RNAi-treated and control animals (data not shown), RNAi treatment was performed already upon hatching and led to a downregulation of the target mRNA by 80%–100% (Figure 4A). Young adult hermaphrodites (6 days after hatching) were subjected to oil red O

staining to assess neutral lipid storage (Soukas et al., 2009). Indeed, *prp-19* RNAi animals exhibited reduced fat mass compared with the RNAi control, while *wrn-1*, *M18.5*, and *xpa-1* RNAi did not yield significant differences (Figures 4B and 4C).

We expected to further enhance the observed fat storage phenotype by using the CF1814 strain, which is mutated in *rrf-3* and *daf-2* and exhibits increased RNAi efficiency (Simmer et al., 2002), as well as elevated fat mass (Soukas et al.,

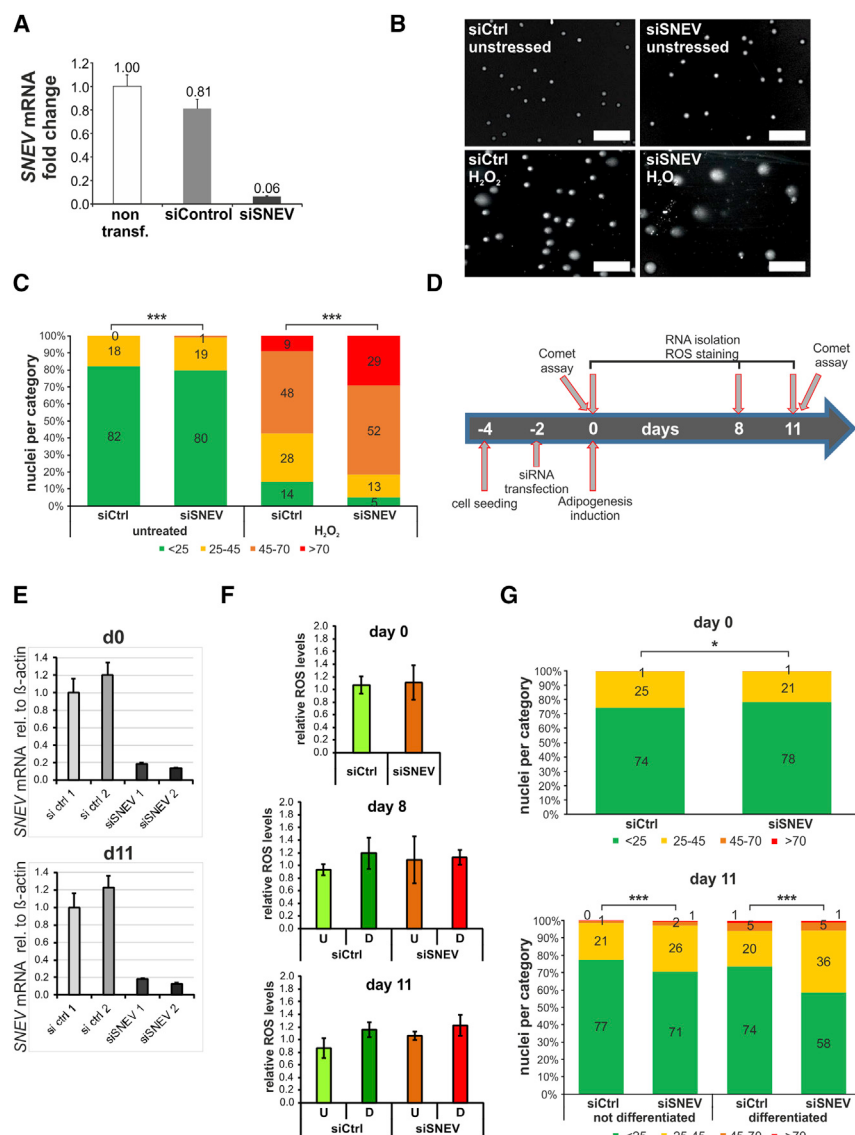

**Figure 3. SNEV Is Required for Repair of Oxidative DNA Damage during Adipogenic Differentiation of hASCs**

hASCs were transfected with siSNEV or si-Control, treated with 500  $\mu$ M H<sub>2</sub>O<sub>2</sub> for 90 and 60 min recovery, and submitted to comet assay.

(A) Transfection with siSNEV results in 90% reduction of SNEV mRNA expression. The average of four technical replicates of cells from donor 812 is shown. Error bars indicate SD.

(B) Representative images of comet assays. Scale bar, 100  $\mu$ m.

(C) In hASCs transfected with siSNEV and treated with H<sub>2</sub>O<sub>2</sub>, the percentage of cells with high levels of DNA damage triples, while the percentage of cells with low DNA damage drops to one-third compared with control cells after H<sub>2</sub>O<sub>2</sub> treatment. Numbers indicate the percentage of cells in the respective category. Pooled data from three biological replicates are shown (donors 803, 812, and 851). A minimum of 150 cells per condition and replicate were analyzed. Chi-square test was performed to compare results from control and SNEV knockdown: \*\*\* $p < 0.001$ .

(D) Schematic representation of experimental design. hASC were transfected with SNEV or control siRNAs and submitted to adipogenic differentiation. RNA samples to monitor knockdown and ROS measurements were taken on days 0, 8, and 11 of differentiation. Comet assays were performed on days 0 and 11.

(E) RT-qPCR shows stable knockdown over the course of differentiation.

(F) ROS formation was quantified by H<sub>2</sub>DCFDA staining. Mean values of three independent differentiation experiments are shown (2 $\times$

donor 812 and 1 $\times$  donor 803). Error bars indicate SD. Unpaired two-sided Student's  $t$  tests were performed to compare control and siSNEV treated samples and did not reveal statistical differences for any condition.

(G) Upper panel, 48 hr post-transduction, before adipogenic differentiation is induced, Comet assays reveal that DNA damage levels are slightly higher in siControl than siSNEV transfected ASCs. Lower panel, after adipogenic differentiation, SNEV knockdown leads to significant increase of DNA damage. Numbers indicate percentage of cells in the respective category. Pooled data from three independent differentiation experiments are shown (donors 803, 812, and 851). A minimum of 200 cells per condition and replicate were analyzed. Chi-square test was performed to compare results of control and SNEV knockdown: \*\*\* $p < 0.001$ , \* $p < 0.05$ . See also [Figures S3](#) and [S4](#).

2009). While the RNAi control group stained positive for oil red O throughout the whole body and especially surrounding intestine and pharynx, *prp-19* and *wrn-1* RNAi worms stained only weakly positive in close proximity to the pharynx ([Figures 4D](#) and [4E](#)), now also detecting differences induced by WRN deficiency.

These findings indicate that loss of the conserved DDR factors *prp-19* and *wrn-1* reduces the accumulation of neutral lipids in *C. elegans*.

## DISCUSSION

SNEV regulates diverse cellular processes, such as mRNA splicing ([Grillari et al., 2005](#)), transcription ([Chanarat et al., 2012](#)), mitosis ([Watrin et al., 2014](#)), apoptosis ([Lu et al., 2014](#)), and multiple branches of DNA repair (reviewed in [Mahajan, 2016](#)). On the one hand, SNEV catalyzes the formation of polyubiquitin chains on replication protein A associated with single-stranded DNA arising at

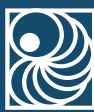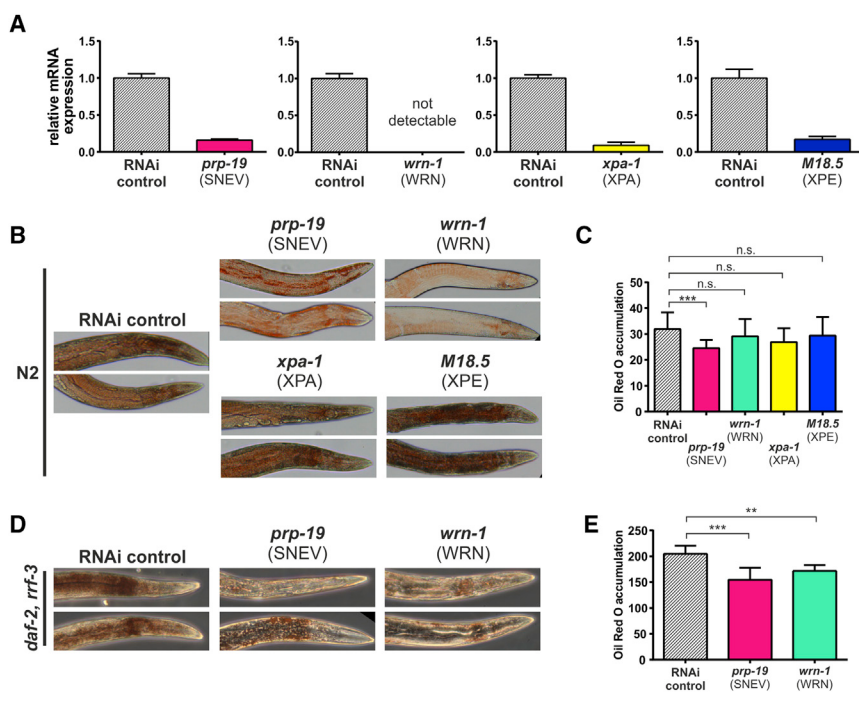

**Figure 4. Loss of SNEV and WRN Reduces Fat Deposition in *C. elegans***

(A) Verification of RNAi efficacy upon depletion of *prp-19*, *wrn-1*, *xpa-1*, and *M18.5* in wild-type *C. elegans* by qPCR. Knockdown efficiency was always between 80% and 100%. Error bars represent SEM of four technical replicates.

(B and C) Oil red O staining demonstrates significantly lower fat deposition upon *prp-19* knockdown, compared with the empty vector (HT115) control. Representative images (B) and quantification (C) of three biological replicates with at least 20 worms per strain are shown. Error bars represent SEM. \*\*\*p < 0.001. n.s., not significant.

(D and E) RNAi to *prp-19* and *wrn-1* in the high-fat and RNAi hypersensitive CF1841 strain, followed by oil red O staining confirms lower fat deposition compared with the empty vector control for both genes. Representative images (D) and quantification (E) of three replicates with at least 20 worms per strain. Error bars represent SEM. \*\*p < 0.01, \*\*\*p < 0.001.

sites of DNA damage, which enhances ATR-ATRIP recruitment and consequently downstream DDR signaling (Wan and Huang, 2014). On the other hand, SNEV is recruited to RNA polymerase II via U2AF65, and this interaction stimulates co-transcriptional splicing in vitro (David et al., 2011). It is possible that SNEV senses the slowing of RNA polymerase II processivity when it encounters a lesion and acts as signal transducer to attract other DNA repair factors.

Albeit we cannot completely rule out off-target effects of the single siRNA pool we used in this study to deplete SNEV in hASCs, the requirement of SNEV for adipogenesis seems to be evolutionary well conserved, as we observed reduced fat deposition in the nematode *C. elegans* upon depletion of *prp-19* by RNAi.

In addition to our data, several other lines of evidence point to a possible role for the DNA repair function of SNEV in adipogenesis. The loss of multiple stem cell functions with increasing age can be attributed to an accumulation of DNA damage (reviewed in Behrens et al., 2014), and hematopoietic stem cell self-renewal was already shown to be diminished after DNA damage (Wang et al., 2012), supporting the idea that the capacity of repairing DNA damage is a general checkpoint before differentiation.

But why does reduced DNA repair upon SNEV knockdown specifically block adipogenic, but not osteogenic differentiation? One hypothesis is based on the fact that ROS are specifically formed during adipogenic differentiation and are thought to reinforce pro-adipogenic

signaling pathways (Kanda et al., 2011), while osteogenic differentiation is accompanied by a reduction of intracellular ROS (Atashi et al., 2015). Indeed, we observed accumulation of DNA damage in hASCs after SNEV knockdown, both after acute hydrogen peroxide treatment and after endogenous ROS accumulation resulting from adipogenic differentiation. Therefore, we suggest that only cells with sufficient DDR capacity might be allowed to enter adipogenic differentiation, as DDR is induced during early adipogenesis (Meulle et al., 2008). This lack of adipogenic differentiation together with adipose tissue degeneration induced by senescent adipocytes might contribute to the subcutaneous fat loss in segmental progeroid syndrome patients (Martin and Oshima, 2000) and mouse models of premature aging, such as ERCC1-, *Csb*-, or *Xpa*-deficient mice (Jaarsma et al., 2013; Kamenisch et al., 2010).

However, we cannot rule out the possibility that SNEV might play a more direct role during early adipogenic commitment of hASCs, e.g., via differential pre-mRNA splicing. Also, a scenario involving p21 regulation by SNEV is possible. After inducing adipogenesis in preadipocytes, cells undergo a transient increase in DNA synthesis, followed by an arrest in the G1 phase, which is characterized by an increase in p21 protein levels (Reichert and Eick, 1999). Interestingly, the SNEV/Cdc5L complex is recruited to the *p21* gene and mRNA and is specifically required for protein expression of p21, but not of pro-apoptotic p53-targets (Chen et al., 2011).



To summarize, we suggest that availability of DDR might represent a checkpoint for cellular differentiation programs, which is of special importance for differentiation processes that involve high levels of ROS, or for long-lived cells such as adipocytes.

## EXPERIMENTAL PROCEDURES

Experimental details can be found in the [Supplemental Experimental Procedures](#).

### hASC Cultivation

Human subcutaneous adipose tissues were obtained from three different donors by liposuction ([Table S2](#)). Informed consent of the donors was obtained and therefore this study was performed according to the Declaration of Helsinki and approved by the local ethics commission (Ethikkommission des Landes Oberösterreich). hASCs were isolated and cultivated as described by [Wolbank et al. \(2009\)](#) and characterized for surface markers ([Table S3](#)). Adipogenic and osteogenic differentiation, as well as oil red O and alizarin red staining were performed as described by [Schosserer et al. \(2015\)](#). Triglycerides were quantified by an Infinity Triglyceride Quantification Kit (Thermo Scientific) and normalized to total protein concentration as measured using the BCA Kit (Thermo Scientific).

siRNA against SNEV (ON-TARGETplus Human PRPF19 [27339] siRNA, SMARTpool) and control siRNA (ON-TARGETplus Non-targeting Pool) were purchased from Thermo Scientific. siRNAs against *WRN*, *CSA*, and *XPE* and a non-targeting control were purchased from Ribox Pharmaceuticals.

A total of 14,000 hASCs was seeded into 1.9 cm<sup>2</sup> plates. Forty-eight hours post-seeding, cells were transfected with siRNA using 50 nM of the respective siRNAs and DharmaFECT1 Transfection Reagent (Thermo Scientific).

Total RNA was extracted using TRIzol Reagent (Life Technologies). RNA concentration was on a NanoDrop ND-1000 spectrophotometer. cDNA was synthesized using 500 ng total RNA with the DyNAmo cDNA Synthesis Kit (Thermo Scientific). qPCR was performed using HOT FIREPol EvaGreen qPCR Supermix (Solis BioDyne). Primers for qPCR are listed in [Table S4](#). mRNA expression was normalized to *GAPDH*.

SNEV cDNA was amplified by PCR and cloned into the retroviral plasmid pLenti6. The negative control vector contained only the blasticidin resistance gene. Retroviral particles were generated according to the manufacturer's protocol (Life Technologies). A total of 14,000/1.9 cm<sup>2</sup> hASCs were seeded in growth medium and, after 48 hr, infected with retroviral particles at an MOI of 2 in DMEM (4.5 g/L glucose), supplemented with 4 mM L-glutamine, 10% fetal calf serum, 1 ng/mL basic fibroblast growth factor, and 8 µg/mL polybrene. The medium was replaced with the same medium without polybrene 24 hr post-transduction and with adipogenesis-inducing medium 48 hr post-transduction.

### Microarray Analysis

Global gene expression analysis was performed by two-color microarrays for hASCs upon SNEV knockdown (donors 803 and

812 as independent biological replicates), as well as for human multipotent adipose-derived stem cells at various stages of adipocyte differentiation. Metadata (experimental parameters and detailed procedures), raw data files, and final (filtered and normalized) data are accessible via Gene Expression Omnibus (GEO: GSE64937 and GSE64845).

### Western Blotting and Immunofluorescence

hASCs were harvested in radioimmunoprecipitation assay buffer (25 mM Tris-HCl [pH 7.6], 150 mM NaCl, 1% NP-40, 1% sodium deoxycholate, 0.1% SDS, and 1× protease and phosphatase inhibitor [Roche]), sonicated for 30 cycles (30 s on and 30 s off) at 4°C using a Bioruptor sonicator (Diagenode) and centrifuged for 30 min at 10,000 rpm. Protein concentration in the supernatant was determined using the BCA Kit (Thermo Scientific). Protein (30 µg) was mixed with 4× SDS loading dye (240 mM Tris-Cl [pH 6.8], 8% SDS, 40% glycerol, 0.05% bromophenol blue, and 5% β-mercaptoethanol), heated to 95°C for 10 min and submitted to SDS-PAGE and western blotting. SDS-PAGE and western blotting were carried out as described previously ([Dellago et al., 2012](#)).

At day 10, cells were fixed in paraformaldehyde and processed for immunofluorescence as described previously ([Schosserer et al., 2015](#)); antibody details can be found in the [Supplemental Information](#).

### Quantification of ROS

Adipogenic differentiation was induced 48 hr post-transfection as described above. On days 0, 8, and 11 of adipogenic differentiation, cells were harvested, resuspended in PBS containing 10 µM 2',7'-dichlorodihydrofluorescein diacetate (H<sub>2</sub>DCFDA; Life Technologies) and incubated for 30 min at room temperature in the dark. After incubation, cells were put on ice and fluorescence was measured on a Gallios Flow Cytometer (Beckman Coulter).

### Comet Assay

Undifferentiated hASCs were transfected with siSNEV and siControl as described above. Two days after transfection, cells were treated with 500 µM hydrogen peroxide (Sigma) in growth medium for 90 min. After 60 min recovery in growth medium, cells were harvested and processed for comet assays ([Wojewódzka et al., 2002](#)) and quantified as described previously ([Guo et al., 2013](#)).

### C. elegans

*C. elegans* strains were cultured at 20°C under standard laboratory conditions on nematode growth medium agar as described previously ([Brenner, 1974](#)). Worms were synchronized by timed egg-lay on fresh RNAi plates and transferred to FUDR (Sigma)-containing plates upon adulthood. For knockdown, worms were fed double-stranded RNA expressed in bacteria as described previously ([Timmons et al., 2001](#)). RNAi constructs against *prp-19*, *wm-1*, *xpe-1*, and *M18.5 (xpa)*, derived from J. Ahringer's RNAi library, were obtained from Source BioScience. Oil red O staining was performed 6 days after hatching as described previously ([Soukas et al., 2009](#)). Stained worms were embedded in Mowiol and pictures were taken on a Leica DM IL LED inverted microscope with a 10× dry objective and staining was quantified as described previously ([Yen et al., 2010](#)). For qPCR, 30–40 worms were rinsed off



plates and washed with S Basal, precipitated by gravity, and homogenized in Trizol using a pellet pestle. Samples were then processed as described for hASCs.

## Statistical Analysis

Differences between datasets were tested for statistical significance using multiple-comparison adjusted Student's *t* tests, one-way ANOVA, or two-way ANOVA implemented in Prism QuickCalcs (GraphPad), and *p* < 0.05 was considered statistically significant. All error bars represent SDs of the mean if not indicated otherwise. For comet assays, counts from three donors were pooled, classified into categories, and analyzed by chi-square test.

## SUPPLEMENTAL INFORMATION

Supplemental Information includes Supplemental Experimental Procedures, four figures, and four tables and can be found with this article online at <http://dx.doi.org/10.1016/j.stemcr.2016.12.001>.

## AUTHOR CONTRIBUTIONS

A.K., H.D., R.G.V., M.Scho., and J.G. designed the experiments; A.K., H.D., M.Scho., V.S., and L.T. performed the experiments with ASCs and analyzed the data; M.K. and M.Sche. designed and performed the microarrays and analyzed the data; S.W., F.H., A.H., and C.G. isolated and characterized the mesenchymal stem cells; C.M. and P.J.D. provided the lentiviral particles; M.Scho. performed the experiments with *C. elegans* and analyzed the data; A.K., H.D., M.K., M.Scho., and J.G. designed the figures and wrote the manuscript. All authors read and corrected the manuscript.

## ACKNOWLEDGMENTS

We are grateful to J. Binder, D. Pulferer, C. Heissenberger, and M. Mur for technical assistance. *C. elegans* strains were provided by the CGC, funded by the NIH Office of Research Infrastructure Programs (P40 OD010440). We thank the BOKU-VIBT Imaging Center for technical support with microscopy. This work was supported by the Austrian Science Fund (FWF, I2514 and P24498), by the Austrian Federal Ministry of Science, Research and Economy, and by the National Foundation for Research, Technology and Development; by the Higher Education Commission (HEC) of Pakistan as well as by the Christian Doppler Research Society. The financial support by the Austrian Federal Ministry of Economy, Family and Youth and the National Foundation for Research, Technology and Development is also gratefully acknowledged. J.G. and R.G.V. are founders and shareholders of Evercyte GmbH.

Received: November 16, 2015

Revised: December 1, 2016

Accepted: December 1, 2016

Published: December 29, 2016

## REFERENCES

Abbas, M., Shanmugam, I., Bsaili, M., Hromas, R., and Shaheen, M. (2014). The role of the human psoralen 4 (hPso4) protein complex in replication stress and homologous recombination. *J. Biol. Chem.* 289, 14009–14019.

Ahima, R.S. (2009). Connecting obesity, aging and diabetes. *Nat. Med.* 15, 996–997.

Atashi, F., Modarressi, A., and Pepper, M.S. (2015). The role of reactive oxygen species in mesenchymal stem cell adipogenic and osteogenic differentiation: a review. *Stem Cells Dev.* 24, 1150–1163.

Behrens, A., van Deursen, J.M., Rudolph, K.L., and Schumacher, B. (2014). Impact of genomic damage and ageing on stem cell function. *Nat. Cell Biol.* 16, 201–207.

Brenner, S. (1974). The genetics of *Caenorhabditis elegans*. *Genetics* 77, 71–94.

Caso, G., McNurlan, M.A., Mileva, I., Zemlyak, A., Mynarcik, D.C., and Gelato, M.C. (2013). Peripheral fat loss and decline in adipogenesis in older humans. *Metabolism* 62, 337–340.

Chanarat, S., Burkert-Kautzsch, C., Meinel, D.M., and Sträßer, K. (2012). Prp19C and TREX: interacting to promote transcription elongation and mRNA export. *Transcription* 3, 8–12.

Chen, Y., Zhang, L., and Jones, K.A. (2011). SKIP counteracts p53-mediated apoptosis via selective regulation of p21Cip1 mRNA splicing. *Genes Dev.* 25, 701–716.

Cho, S.Y., Shin, E.S., Park, P.J., Shin, D.W., Chang, H.K., Kim, D., Lee, H.H., Lee, J.H., Kim, S.H., Song, M.J., et al. (2007). Identification of mouse Prp19p as a lipid droplet-associated protein and its possible involvement in the biogenesis of lipid droplets. *J. Biol. Chem.* 282, 2456–2465.

David, C.J., Boyne, A.R., Millhouse, S.R., and Manley, J.L. (2011). The RNA polymerase II C-terminal domain promotes splicing activation through recruitment of a U2AF65-Prp19 complex. *Genes Dev.* 25, 972–983.

Dellago, H., Khan, A., Nussbacher, M., Gstraunthaler, A., Schossener, M., Mück, C., Anrather, D., Scheffold, A., Ammerer, G., Dürr, P.J., et al. (2012). ATM-dependent phosphorylation of SNEVhPrp19/hPso4 is involved in extending cellular life span and suppression of apoptosis. *Aging (Albany NY)* 4, 290–304.

Grillari, J., Ajuh, P., Stadler, G., Löscher, M., Voglauer, R., Ernst, W., Chusainow, J., Eisenhaber, F., Pokar, M., Fortschegger, K., et al. (2005). SNEV is an evolutionarily conserved splicing factor whose oligomerization is necessary for spliceosome assembly. *Nucleic Acids Res.* 33, 6868–6883.

Guo, J., Hanawalt, P.C., and Spivak, G. (2013). Comet-FISH with strand-specific probes reveals transcription-coupled repair of 8-oxoGuanine in human cells. *Nucleic Acids Res.* 41, 7700–7712.

Jaarsma, D., van der Pluijm, I., van der Horst, G.T.J., and Hoeijmakers, J.H.J. (2013). Cockayne syndrome pathogenesis: lessons from mouse models. *Mech. Ageing Dev.* 134, 180–195.

James, A.W. (2013). Review of signaling pathways governing MSC osteogenic and adipogenic differentiation. *Scientifica (Cairo)* 2013, 684736.

Kamenisch, Y., Fousteri, M., Knoch, J., von Thaler, A.-K., Fehrenbacher, B., Kato, H., Becker, T., Dollé, M.E.T., Kuiper, R., Majors, M., et al. (2010). Proteins of nucleotide and base excision repair pathways interact in mitochondria to protect from loss of subcutaneous fat, a hallmark of aging. *J. Exp. Med.* 207, 379–390.

Kanda, Y., Hinata, T., Kang, S.W., and Watanabe, Y. (2011). Reactive oxygen species mediate adipocyte differentiation in mesenchymal stem cells. *Life Sci.* 89, 250–258.

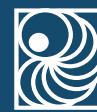

- Karakasilioti, I., Kamileri, I., Chatzinikolaou, G., Kosteas, T., Vergadi, E., Robinson, A.R., Tsamardinos, I., Rozgaja, T.A., Siakouli, S., Tsatsanis, C., et al. (2013). DNA damage triggers a chronic auto-inflammatory response, leading to fat depletion in NER progeria. *Cell Metab.* 18, 403–415.
- Löscher, M., Fortschegger, K., Ritter, G., Wostry, M., Voglauer, R., Schmid, J.A., Watters, S., Rivett, A.J., Ajuh, P., Lamond, A.I., et al. (2005). Interaction of U-box E3 ligase SNEV with PSMB4, the beta7 subunit of the 20 S proteasome. *Biochem. J.* 388, 593–603.
- Lu, S., Wang, R., Cai, C., Liang, J., Xu, L., Miao, S., Wang, L., and Song, W. (2014). Small kinetochore associated protein (SKAP) promotes UV-induced cell apoptosis through negatively regulating Pre-mRNA processing factor 19 (Prp19). *PLoS One* 9, e92712.
- Mahajan, K. (2016). hPso4/hPrp19: a critical component of DNA repair and DNA damage checkpoint complexes. *Oncogene* 35, 2279–2286.
- Mahajan, K.N., and Mitchell, B.S. (2003). Role of human Pso4 in mammalian DNA repair and association with terminal deoxynucleotidyl transferase. *Proc. Natl. Acad. Sci. USA* 100, 10746–10751.
- Martin, G.M., and Oshima, J. (2000). Lessons from human progeroid syndromes. *Nature* 408, 263–266.
- Meulle, A., Salles, B., Daviaud, D., Valet, P., and Muller, C. (2008). Positive regulation of DNA double strand break repair activity during differentiation of long life span cells: the example of adipogenesis. *PLoS One* 3, e3345.
- Mikkelsen, T.S., Xu, Z., Zhang, X., Wang, L., Gimble, J.M., Lander, E.S., and Rosen, E.D. (2010). Comparative epigenomic analysis of murine and human adipogenesis. *Cell* 143, 156–169.
- Monteforte, R., Beilhack, G.F., Grausenburger, R., Mayerhofer, B., Bittner, R., Grillari-Voglauer, R., Sibilia, M., Dellago, H., Tschachler, E., Gruber, F., and Grillari, J. (2016). SNEV(Prp19/PSO4) deficiency increases PUVA-induced senescence in mouse skin. *Exp. Dermatol.* 25, 212–217.
- Mori, S., Murano, S., Yokote, K., Takemoto, M., Asaumi, S., Take, A., and Saito, Y. (2001). Enhanced intra-abdominal visceral fat accumulation in patients with Werner's syndrome. *Int. J. Obes. Relat. Metab. Disord.* 25, 292–295.
- Muzumdar, R., Allison, D.B., Huffman, D.M., Ma, X., Atzmon, G., Einstein, F.H., Fishman, S., Poduval, A.D., McVei, T., Keith, S.W., and Barzilai, N. (2008). Visceral adipose tissue modulates mammalian longevity. *Aging Cell* 7, 438–440.
- Reichert, M., and Eick, D. (1999). Analysis of cell cycle arrest in adipocyte differentiation. *Oncogene* 18, 459–466.
- Schossere, M., Reynoso, R., Wally, V., Jug, B., Kantner, V., Weilner, S., Buric, I., Grillari, J., Bauer, J.W., and Grillari-Voglauer, R. (2015). Urine is a novel source of autologous mesenchymal stem cells for patients with epidermolysis bullosa. *BMC Res. Notes* 8, 767.
- Simmer, F., Tijsterman, M., Parrish, S., Koushika, S.P., Nonet, M.L., Fire, A., Ahringer, J., and Plasterk, R.H.A. (2002). Loss of the putative RNA-directed RNA polymerase RRF-3 makes *C. elegans* hypersensitive to RNAi. *Curr. Biol.* 12, 1317–1319.
- Song, E.J., Werner, S.L., Neubauer, J., Stegmeier, F., Aspden, J., Rio, D., Harper, J.W., Elledge, S.J., Kirschner, M.W., and Rape, M. (2010). The Prp19 complex and the Usp4Sart3 deubiquitinating enzyme control reversible ubiquitination at the spliceosome. *Genes Dev.* 24, 1434–1447.
- Soukas, A.A., Kane, E.A., Carr, C.E., Melo, J.A., and Ruvkun, G. (2009). Rictor/TORC2 regulates fat metabolism, feeding, growth, and life span in *Caenorhabditis elegans*. *Genes Dev.* 23, 496–511.
- Tchkonia, T., Morbeck, D.E., Von Zglinicki, T., Van Deursen, J., Lustgarten, J., Scrable, H., Khosla, S., Jensen, M.D., and Kirkland, J.L. (2010). Fat tissue, aging, and cellular senescence. *Aging Cell* 9, 667–684.
- Timmons, L., Court, D.L., and Fire, A. (2001). Ingestion of bacterially expressed dsRNAs can produce specific and potent genetic interference in *Caenorhabditis elegans*. *Gene* 263, 103–112.
- Turaga, R.V.N., Paquet, E.R., Sild, M., Vignard, J., Garand, C., Johnson, F.B., Masson, J.-Y., and Lebel, M. (2009). The Werner syndrome protein affects the expression of genes involved in adipogenesis and inflammation in addition to cell cycle and DNA damage responses. *Cell Cycle* 8, 2080–2092.
- Voglauer, R., Chang, M.W.-F., Dampier, B., Wieser, M., Baumann, K., Sterovsky, T., Schreiber, M., Katinger, H., and Grillari, J. (2006). SNEV overexpression extends the life span of human endothelial cells. *Exp. Cell Res.* 312, 746–759.
- Wan, L., and Huang, J. (2014). The PSO4 complex associates with RPA and modulates the activation of ATR. *J. Biol. Chem.* 289, 6619–6626.
- Wang, J., Sun, Q., Morita, Y., Jiang, H., Groß, A., Lechel, A., Hildner, K., Guachalla, L.M., Gompf, A., Hartmann, D., et al. (2012). A differentiation checkpoint limits hematopoietic stem cell self-renewal in response to DNA damage. *Cell* 148, 1001–1014.
- Watrin, E., Demidova, M., Watrin, T., Hu, Z., and Prigent, C. (2014). Sororin pre-mRNA splicing is required for proper sister chromatid cohesion in human cells. *EMBO Rep.* 15, 1–8.
- Wojewódzka, M., Buraczewska, I., and Kruszewski, M. (2002). A modified neutral comet assay: elimination of lysis at high temperature and validation of the assay with anti-single-stranded DNA antibody. *Mutat. Res.* 518, 9–20.
- Wolbank, S., Stadler, G., Peterbauer, A., Gillich, A., Karbiener, M., Streubel, B., Wieser, M., Katinger, H., van Griensven, M., Redl, H., et al. (2009). Telomerase immortalized human amnion- and adipose-derived mesenchymal stem cells: maintenance of differentiation and immunomodulatory characteristics. *Tissue Eng. Part A* 15, 1843–1854.
- Yen, K., Le, T.T., Bansal, A., Narasimhan, S.D., Cheng, J.-X., and Tissenbaum, H.A. (2010). A comparative study of fat storage quantitation in nematode *Caenorhabditis elegans* using label and label-free methods. *PLoS One* 5, e12810.
- Zhang, N.X., Kaur, R., Lu, X.Y., Shen, X., Li, L., and Legerski, R.J. (2005). The Pso4 mRNA splicing and DNA repair complex interacts with WRN for processing of DNA interstrand cross-links. *J. Biol. Chem.* 280, 40559–40567.

**Supplemental Information**

**SNEV<sup>hPrp19/hPso4</sup> Regulates Adipogenesis of Human Adipose Stromal Cells**

**Abdulhameed Khan, Hanna Dellago, Lucia Terlecki-Zaniewicz, Michael Karbiener, Sylvia Weilner, Florian Hildner, Viktoria Steininger, Christian Gabriel, Christoph Mück, Pidder Jansen-Dürr, Ara Hacobian, Marcel Scheideler, Regina Grillari-Voglauer, Markus Schosserer, and Johannes Grillari**

### **Supplemental Experimental Data Items:**

#### **Fig. S1 (related to Fig. 2)**

#### **Knock-down of SNEV downregulates components of signalling pathways involved in adipogenic differentiation and does not interfere with osteogenic differentiation.**

(A) Micro-array based analysis of transcript expression assorted to the KEGG PPAR $\gamma$  signalling pathway is shown as heat map after GSEA. (B) Expression of transcripts assorted to the KEGG insulin signaling pathway is shown as heat map. (C) Expression of transcripts assorted to the KEGG TGF- $\beta$  signaling pathway is shown as heat map. Numbers within cells are log2-transformed expression ratios (siSNEV /siControl). The red vertical line denotes the range of this gene set relative to all 3,250 transcripts that could be detected (small heat map). FDR q-value obtained from GSEA is depicted bottom right. (D) *SNEV* mRNA fluctuates during osteogenic differentiation. Osteogenic differentiation of hASCs was induced and *SNEV* mRNA expression was determined by qPCR. (E) hASCs were transfected with siRNA against SNEV or control siRNA, leading to a knockdown of almost 80%. (F) SNEV knockdown does not interfere with osteogenic differentiation of hASCs. Alizarin Red staining for calcium deposition as end-point measurement for siControl (left panel) and siSNEV (right panel) transfected hASCs.

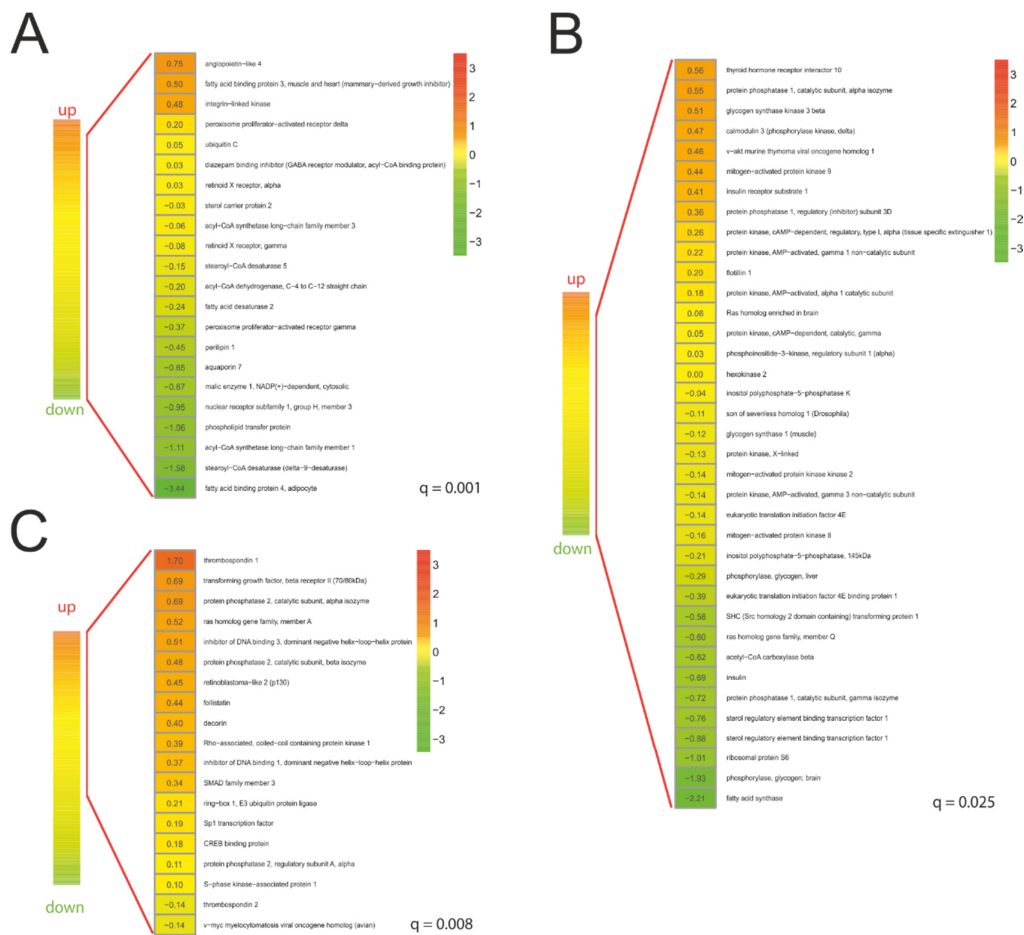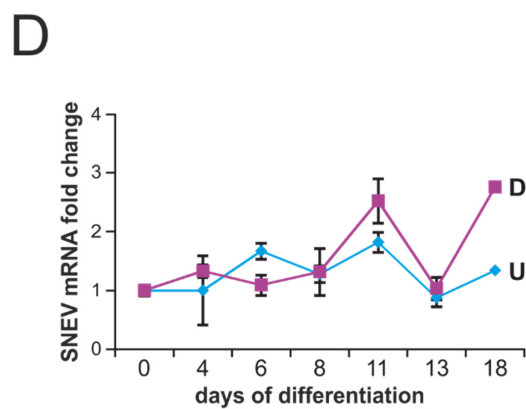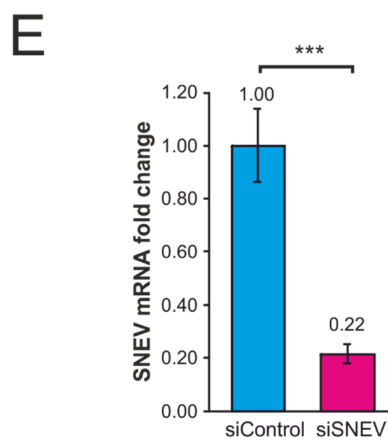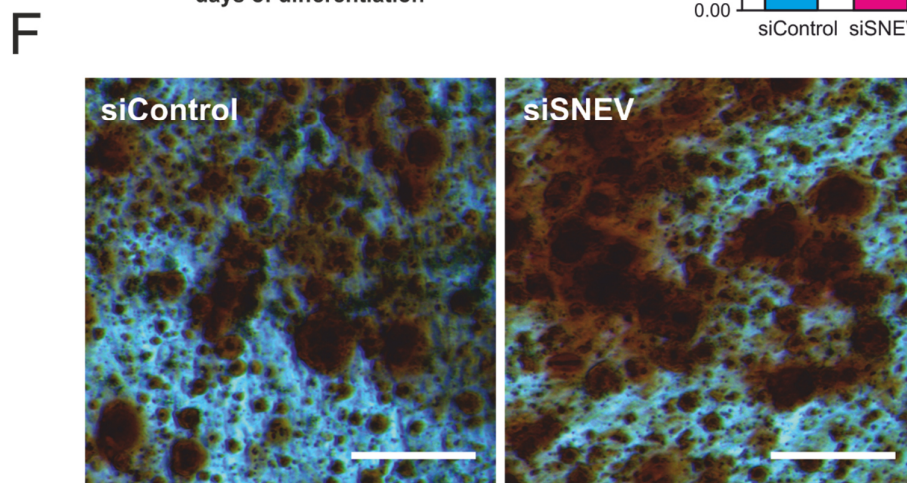

**Fig. S2 (related to Fig. 2)**

**SNEV overexpression accelerates adipogenic differentiation of hASCs.**

**(A)** Schematic representation of experimental design. hASCs were transduced with *SNEV* or empty vector and were sequentially differentiated for 10 days. **(B)** Total RNA isolated at specified time points was subjected to qPCR to analyze *SNEV* mRNA levels to confirm overexpression. The data was normalized to *GAPDH*. N = 4 (four technical replicates from donor 812 are shown. The experiment was repeated twice with cells from the other two other donors with a similar outcome). **(C)** Oil red O staining of intracellular lipids after 6 days of differentiation. Scale bar = 100  $\mu$ m. Exemplary images of cells from donor 812 are shown. **(D)** Intracellular triglyceride levels in transduced hASCs after 6 days of differentiation. The triglyceride content was normalized to total protein content, the mean values of four technical replicates (cells were seeded into four wells of a plate and grown and analysed independently) are shown. Two independent differentiation experiments from two different donors (803 and 812) are shown side-by-side. **(E)** Quantitation of *PPAR $\gamma$*  and **(F)** *FASN* mRNA. N = 4 (four technical replicates from donor 812 are shown. The experiment was repeated twice with cells from the other two other donors with a similar outcome).

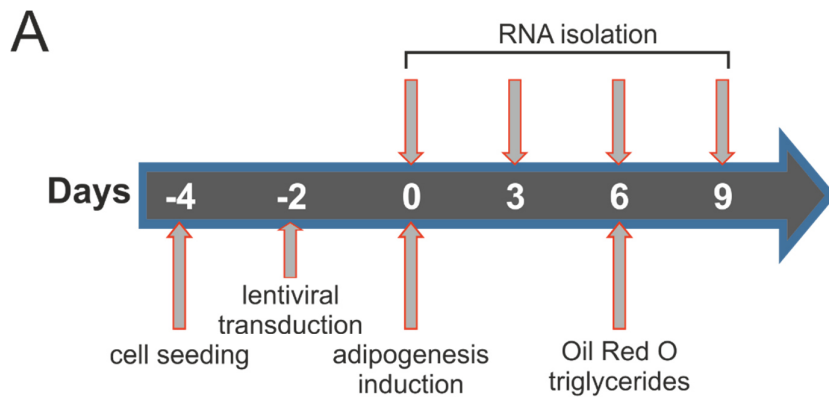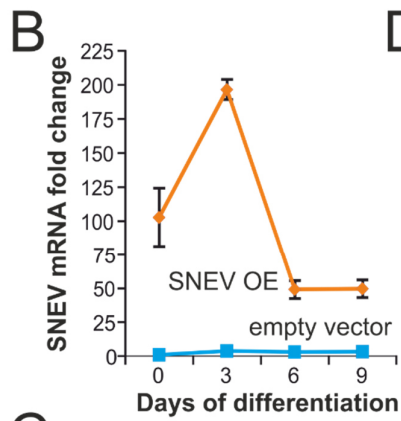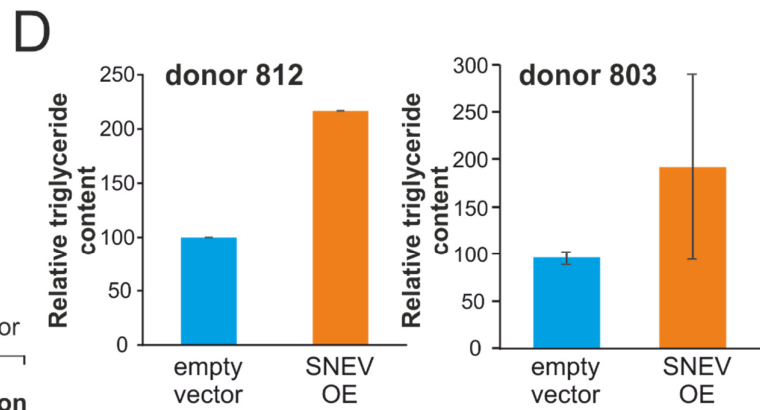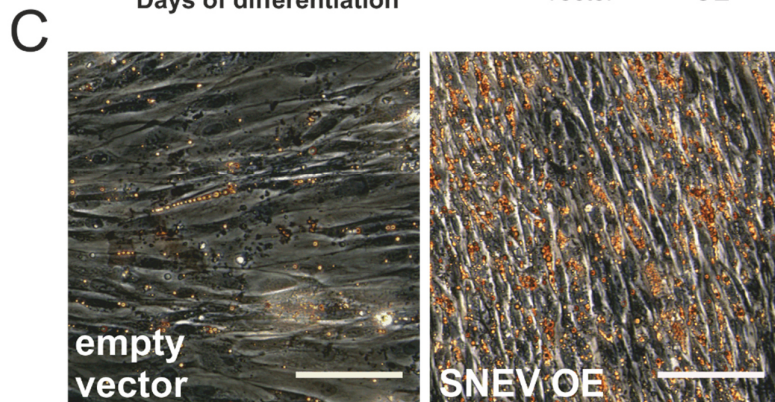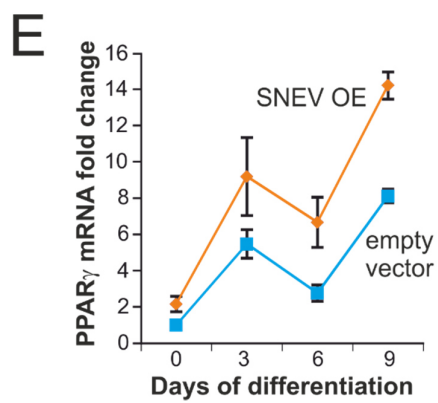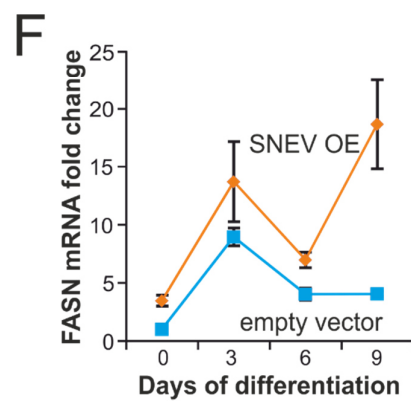

**Fig. S3 (related to Fig. 3)**

**Results of comet assays analysed by two different methods are similar.**

(A) hASCs derived from donor 812 were transfected with siRNA targeting *SNEV* mRNA, followed by oxidative stress treatment using 500  $\mu\text{M}$   $\text{H}_2\text{O}_2$  for 90 min and 60 min recovery. DNA damage induced by that treatment was assessed by a comet assay. Cells were classified into three groups according to tail size, representing no, low to medium or high levels of DNA breaks. Representative pictures of cells in category 1 (no or very small tail), category 2 (small to medium size tail) and category 3 (large tail) are shown. Scale bar = 20  $\mu\text{m}$ . (B) Separate results for two independent siRNA transfections (both with cells from donor 812) are shown. (C) An alternative data analysis based on calculation of tail size using ImageJ yielded similar results as in (B). Pooled data from two replicates are shown. (D) Separate results for the two replicates.

A

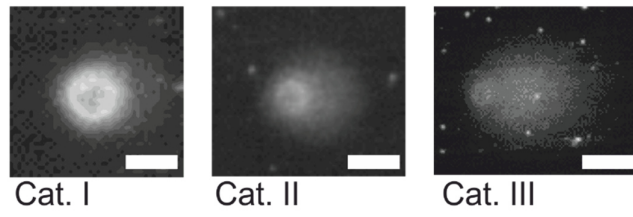

B

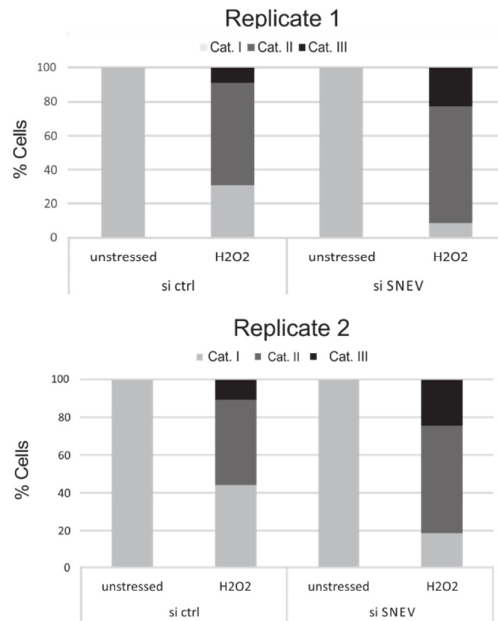

C

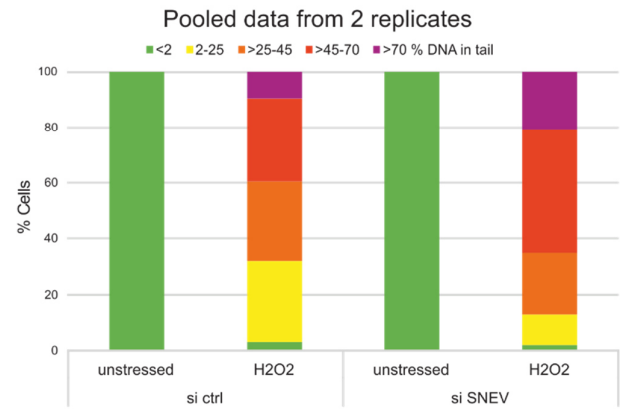

D

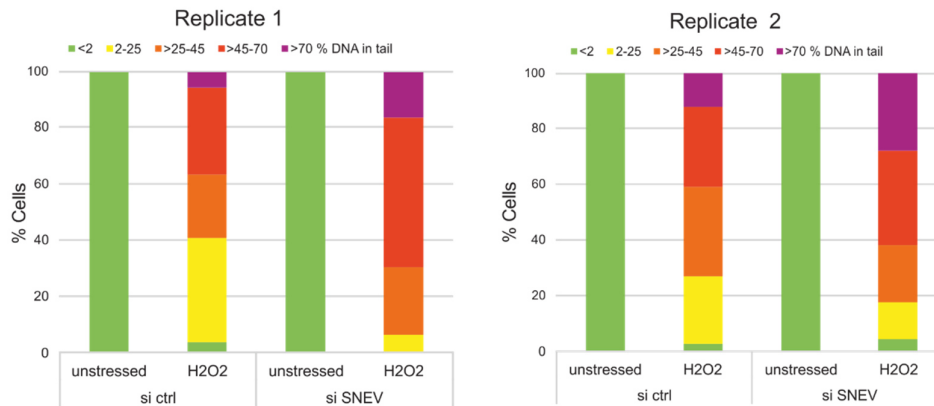

**Fig. S4 (related to Fig. 3)**

**Knock-down of WRN reduces adipogenic differentiation in hASCs.**

(A) Heat map of differentially transcribed genes during adipogenesis. Fold changes were calculated relative to reference day 2. RT-qPCR confirmed regulation of (B) *WRN*, (C) *CSA* and (D) *XPE* during adipogenic differentiation. N = 4 (four technical replicates, the experiment was once repeated independently with cells from a different donor with the same outcome). (E) Knock-down of *WRN*, *CSA*, *XPE* mRNAs was confirmed by qPCR and normalized to *GAPDH*. N = 4 (four technical replicates from one donor are shown. The experiment was repeated twice with cells from two other donors with a similar outcome). (F) Triglyceride content was quantified at day 10 of adipogenic differentiation and normalized to total protein content. N = 4 (cells were seeded into four wells of a plate and grown and analysed independently).

A

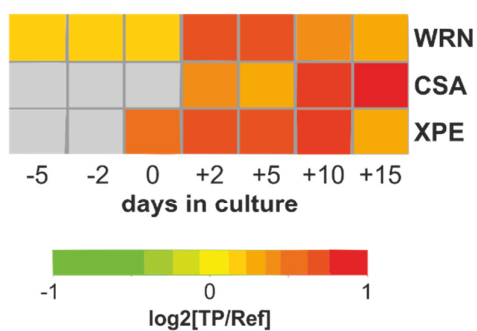

B

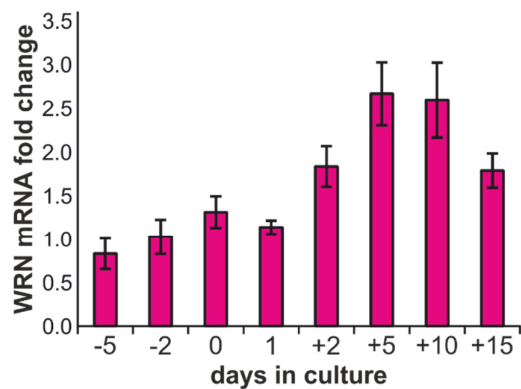

C

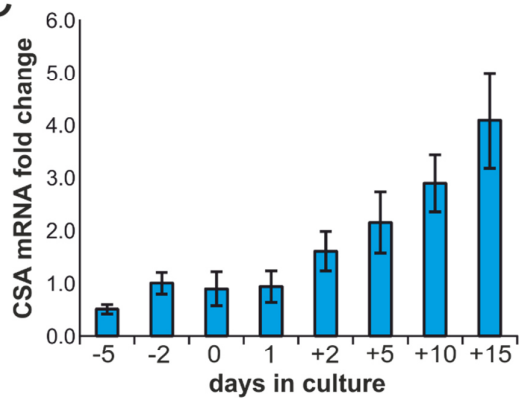

D

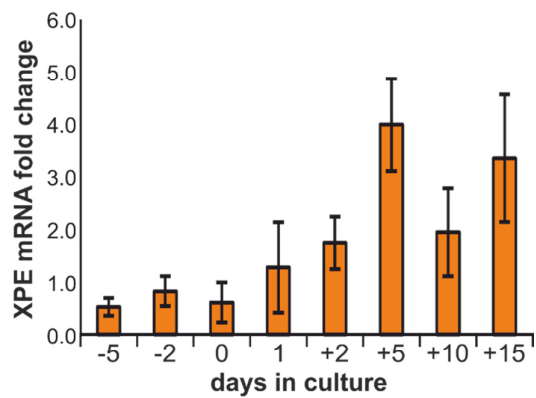

E

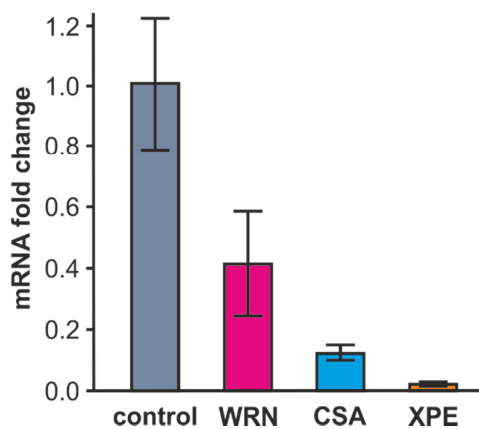

F

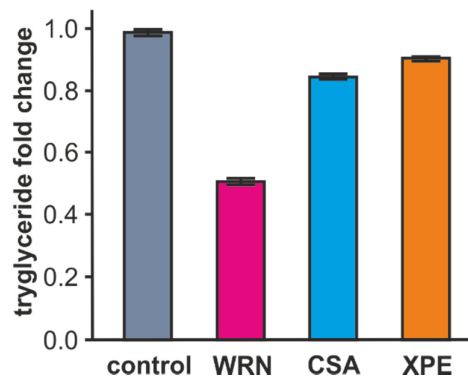

**Table S1 (related to Fig. 2): Significantly enriched gene sets among upregulated and downregulated mRNAs upon SNEV knockdown.**

| gene sets database           | significantly enriched gene sets among UPREGULATED mRNAs  | FDR q-val    |
|------------------------------|-----------------------------------------------------------|--------------|
| KEGG pathways                | KEGG_LEUKOCYTE_TRANSENDOTHELIAL_MIGRATION                 | 0.000        |
|                              | KEGG_REGULATION_OF_ACTIN_CYTOSKELETON                     | 0.000        |
|                              | KEGG_FOCAL_ADHESION                                       | 0.001        |
|                              | KEGG_CELL_ADHESION_MOLECULES_CAMS                         | 0.005        |
|                              | KEGG_LYSOSOME                                             | 0.006        |
|                              | KEGG_PATHOGENIC_ESCHERICHIA_COLI_INFECTION                | 0.006        |
|                              | KEGG_ARRHYTHMOGENIC_RIGHT_VENTRICULAR_CARDIOMYOPATHY_ARVC | 0.007        |
|                              | KEGG_HEMATOPOIETIC_CELL_LINEAGE                           | 0.008        |
|                              | KEGG_ECM_RECEPTOR_INTERACTION                             | 0.008        |
|                              | <b>KEGG_TGF_BETA_SIGNALING_PATHWAY</b>                    | <b>0.008</b> |
|                              | KEGG_TIGHT_JUNCTION                                       | 0.008        |
|                              | KEGG_HYPERTROPHIC_CARDIOMYOPATHY_HCM                      | 0.045        |
|                              | KEGG_TOLL_LIKE_RECEPTOR_SIGNALING_PATHWAY                 | 0.058        |
|                              | KEGG_T_CELL_RECEPTOR_SIGNALING_PATHWAY                    | 0.062        |
|                              | KEGG_COLORECTAL_CANCER                                    | 0.064        |
|                              | KEGG_FC_GAMMA_R_MEDIATED_PHAGOCYTOSIS                     | 0.066        |
|                              | KEGG_VIBRIO_CHOLERAE_INFECTION                            | 0.069        |
|                              | KEGG_DILATED_CARDIOMYOPATHY                               | 0.073        |
|                              | KEGG_ADHERENS_JUNCTION                                    | 0.091        |
|                              | KEGG_SMALL_CELL_LUNG_CANCER                               | 0.092        |
|                              | KEGG_BLADDER_CANCER                                       | 0.092        |
| BP: GO biological process    | ACTIN_FILAMENT_BASED_PROCESS                              | 0.000        |
|                              | ACTIN_CYTOSKELETON_ORGANIZATION_AND_BIOGENESIS            | 0.000        |
|                              | CYTOSKELETON_ORGANIZATION_AND_BIOGENESIS                  | 0.020        |
| CC: GO cellular component    | ACTIN_CYTOSKELETON                                        | 0.000        |
|                              | ER_GOLGI_INTERMEDIATE_COMPARTMENT                         | 0.026        |
|                              | CYTOSKELETON                                              | 0.027        |
|                              | ENDOPLASMIC_RETICULUM                                     | 0.027        |
|                              | MEMBRANE_FRACTION                                         | 0.048        |
|                              | INTEGRAL_TO_MEMBRANE                                      | 0.050        |
|                              | INTRINSIC_TO_MEMBRANE                                     | 0.053        |
|                              | CELL_FRACTION                                             | 0.053        |
|                              | ENDOPLASMIC_RETICULUM_PART                                | 0.055        |
|                              | EXTRACELLULAR_REGION_PART                                 | 0.057        |
|                              | MEMBRANE                                                  | 0.057        |
|                              | PLASMA_MEMBRANE                                           | 0.058        |
|                              | EXTRACELLULAR_REGION                                      | 0.059        |
|                              | ENDOMEMBRANE_SYSTEM                                       | 0.063        |
|                              | GOLGI_APPARATUS                                           | 0.069        |
|                              | MEMBRANE_PART                                             | 0.070        |
|                              | CYTOSKELETAL_PART                                         | 0.071        |
|                              | PROTEINACEOUS_EXTRACELLULAR_MATRIX                        | 0.072        |
|                              | ENDOPLASMIC_RETICULUM_MEMBRANE                            | 0.074        |
|                              | EXTRACELLULAR_MATRIX                                      | 0.075        |
|                              | CELL_PROJECTION                                           | 0.082        |
| MF: GO molecular function    | CYTOSKELETAL_PROTEIN_BINDING                              | 0.004        |
|                              | ACTIN_BINDING                                             | 0.010        |
|                              | PEPTIDE_BINDING                                           | 0.024        |
|                              | NUCLEOSIDE_TRIPHOSPHATASE_ACTIVITY                        | 0.027        |
|                              | HYDROLASE_ACTIVITY_ACTING_ON_ACID_ANHYDRIDES              | 0.034        |
|                              | ATPASE_ACTIVITY_COUPLED                                   | 0.057        |
|                              | ATPASE_ACTIVITY                                           | 0.091        |
| Reactome pathway database    | GTPASE_ACTIVITY                                           | 0.091        |
|                              | REACTOME_HEMOSTASIS                                       | 0.003        |
|                              | REACTOME_AXON_GUIDANCE                                    | 0.005        |
| transcription factor targets | REACTOME_CELL_SURFACE_INTERACTIONS_AT_THE_VASCULAR_WALL   | 0.051        |
|                              | CCAWWNAAGG_V\$SRF_Q4                                      | 0.004        |

| gene sets database                 | significantly enriched gene sets among DOWNREGULATED mRNAs                                                     | FDR q-val |
|------------------------------------|----------------------------------------------------------------------------------------------------------------|-----------|
| KEGG pathways                      | KEGG_RIBOSOME                                                                                                  | 0.000     |
|                                    | KEGG_PPAR_SIGNALING_PATHWAY                                                                                    | 0.001     |
|                                    | KEGG_INSULIN_SIGNALING_PATHWAY                                                                                 | 0.025     |
| BP: GO biological process          | CELLULAR_BIOSYNTHETIC_PROCESS                                                                                  | 0.000     |
|                                    | BIOSYNTHETIC_PROCESS                                                                                           | 0.000     |
| CC: GO cellular component          | RIBONUCLEOPROTEIN_COMPLEX                                                                                      | 0.080     |
| MF: GO molecular function          | OXIDOREDUCTASE_ACTIVITY_GO_0016616                                                                             | 0.085     |
| Reactome pathway database          | REACTOME_3_UTR_MEDIATED_TRANSLATIONAL_REGULATION                                                               | 0.000     |
|                                    | REACTOME_FORMATION_OF_THE_TERNARY_COMPLEX_AND_SUBSEQUENTLY_THE_43S_COMPLEX                                     | 0.000     |
|                                    | REACTOME_ACTIVATION_OF_THE_MRNA_UPON_BINDING_OF_THE_CAP_BINDING_COMPLEX_AND_EIFS_AND_SUBSEQUENT_BINDING_TO_43S | 0.000     |
| transcription factor targets       | no significantly (q<0.1) enriched gene sets                                                                    |           |
| chemical and genetic perturbations | BHATI_G2M_ARREST_BY_2METHOXYESTRADIOL_DN                                                                       | 0.036     |
|                                    | ABE_INNER_EAR                                                                                                  | 0.081     |

**Table S2 (related to Experimental Procedures): Donor information**

hASCs were isolated by liposuction. Basic information on the donors is provided.

| Donor Number        | 803     | 812               | 851     |
|---------------------|---------|-------------------|---------|
| Gender              | female  | female            | female  |
| Age (years)         | 45      | 39                | 25      |
| Site of liposuction | femoral | femoral/abdominal | femoral |
| BMI                 | 30.6    | 31.5              | 26.9    |

**Table S3 (related to Experimental Procedures): Characterization of hASCs**

Typical markers of mesenchymal (CD73, CD90, CD105 and HLA-ABC) and hematopoietic (CD14, CD34, CD45 and HLA-DR) stem cells were analyzed by flow cytometry. The percentage of cells positive for each of the markers is shown.

| Donor                | 803   | 812   | 851   |
|----------------------|-------|-------|-------|
| CD73 [% positive]    | 99.23 | 95.23 | 99.88 |
| CD90 [% positive]    | 99.27 | 80.55 | 99.91 |
| CD105 [% positive]   | 91.12 | 99.68 | 98.84 |
| HLA-ABC [% positive] | 94.72 | 97.57 | 97.54 |
| CD14 [% positive]    | 1.03  | 0.86  | 1.5   |
| CD34 [% positive]    | 4.96  | 1.25  | 1.03  |
| CD45 [% positive]    | 1.95  | 1.19  | 0.95  |
| HLA-DR [% positive]  | 1.87  | 0.75  | 0.73  |

**Table S4 (related to Experimental Procedures): Primers used in this study**

Sequences of primers used in this study are provided.

| Gene name                      | Forward primer          | Reverse primer          |
|--------------------------------|-------------------------|-------------------------|
| <b>SNEV</b>                    | TCATTGCCCCGTCTCACCAAG   | GGCACAGTCTTCCCTCTCTTC   |
| <b>PPAR<math>\gamma</math></b> | AGCCTGCGAAAGCCTTTTGGTGA | GCAGTAGCTGCACGTGTTCCGT  |
| <b>FASN</b>                    | AACTTGCAGGAGTTCTGGGAC   | TGAATCTGGGTTGATGCCTCCG  |
| <b>GAPDH</b>                   | TGTGAGGAGGGGAGATTCAG    | CGACCACTTTGTCAAGCTCA    |
| <b>WRN</b>                     | GTGGCGCTCCACAGTCAT      | TCTCCGAACACATGCCTTTC    |
| <b>CSA</b>                     | GAGGACACGATATGCTGGGG    | CCAGTCCCAAACTCTCCGT     |
| <b>XPE</b>                     | AAGAAACGCCCAGAAACCCA    | ACATCTTCTGCTAGGACCGGA   |
| <b>prp-19 (C. elegans)</b>     | TCGTGTGCGGAATCAGTGGTGA  | TGGTGCTGATCCAGTGCCGC    |
| <b>wrn-1 (C. elegans)</b>      | AGGAAGACACTTTGGTGGACCT  | ACCAAATGCAACTGTCGCAACGA |
| <b>xpa-1 (C. elegans)</b>      | TGCAGGAACGTCGCGAGCAA    | TGCGCAGATCCAGATCGCAA    |
| <b>M18.5 (C. elegans)</b>      | CTCGCTGAGTTCCAGCGCCT    | CCATTGGAATCGAGCGAACGTGG |
| <b>act-1 (C. elegans)</b>      | CTACGAACTTCCTGACGGACAAG | CCGGCGGACTCCATACC       |

## **Supplemental Experimental Procedures:**

### **Adipogenic differentiation**

14,000 hASCs were seeded into 1.9 cm<sup>2</sup> plates in growth medium two days prior to adipogenic induction. Adipogenesis was induced by adding DMEM high glucose (GE Healthcare) supplemented with 549  $\mu$ M 3-Isobutyl-1-methylxanthine (Sigma), 1  $\mu$ M Dexamethasone (Sigma), 549 nM hydrocortisone (Sigma), 66  $\mu$ M Indomethacin (Sigma). Medium was exchanged twice per week. Undifferentiated control hASCs were grown in DMEM high glucose/Ham's F12 (GE Healthcare), supplemented with 10% FCS, 4 mM L-Glutamine and 0.1 ng/ml  $\beta$ -FGF (R&D systems). Total RNA and protein were isolated at specified time points during differentiation. Triglycerides were quantified by Infinity Triglyceride quantification kit (ThermoScientific) according to the manufacturer's recommended protocol and normalized to total protein concentration, as measured using the BCA kit (ThermoScientific).

Oil red O staining of hASCs was performed on day 10 of differentiation. Medium was removed, cells were washed twice with PBS, and fixed by incubating in 3.6% formaldehyde in PBS for 1 h at room temperature. Cells were then washed twice for 5 min with PBS for 5 min, incubated and fixed with 70% ethanol for 2 min followed by 10 min incubation in Oil red O working solution (1.8 mg/ml, Sigma). Cells were washed with PBS until all visible traces of dye were removed. Pictures were taken on a Leica DM IL LED Inverted Microscope with a 10x dry objective (Leica Microsystems).

### **Osteogenic differentiation**

2,000 hASCs were seeded into 1.9 cm<sup>2</sup> plates 72 hours prior to induction of osteogenesis. 72 h post seeding, osteogenesis was induced by low glucose DMEM (GE Healthcare) supplemented with 10% FCS, 4 mM L-Glutamine, 10 mM L-Glycerophosphate (Sigma), 150  $\mu$ M Ascorbate-2-phosphate (Sigma), 10 nM vitamin-D3 (Sigma), 10 nM Dexamethasone (Sigma) and 100  $\mu$ g/ml Primocin. hASCs grown in DMEM low glucose/Ham's F12, 1:1 (PAA) supplemented with 10% FCS, 4 mM L-Glutamine and 1x Primocin were used as control. The medium was replaced every third day until day 12. Osteogenic differentiation was assessed by Alizarin Red staining.

To perform Alizarin Red staining, medium was removed and cells were washed thrice with PBS, fixed with 70% ethanol for 1 h at -20 °C, washed again thrice with PBS, and incubated for 10 min with gentle shaking with Alizarin Red solution (200 mg/ml, Applichem). Cells were washed with PBS until all visible traces of the dye were removed. Pictures were taken on a Leica DM IL LED Inverted Microscope with a 10x dry objective.

### **Antibodies for Western Blot**

Prp19/Pso4 rabbit polyclonal antibody was from Bethyl Laboratories (Montgomery, TX, USA) #A300-102A. As loading controls,  $\beta$ -Actin mouse monoclonal antibody from Sigma-Aldrich (St.Louis, MO, USA; #A-5441), and GAPDH rabbit antibody FL-335 from Santa Cruz (Santa Cruz, CA, USA; #sc-25778) were used.

### **Immunofluorescence**

Cells were washed twice with PBS and fixed in 4% formaldehyde in PBS for 20 min at room temperature. After washing with PBS, cells were permeabilized in 0.25% Triton in PBS for 20 min and blocked in 20% FCS in PBS for 1 h. Cells were washed thrice with PBS and stained with anti-Prp19 antibody (Bethylab) diluted 1:500 in PBS containing 20% FCS for 1 h. Cells were again washed with PBS prior to application of Dyelight 649 anti-rabbit antibody (Jackson ImmunoResearch) diluted 1:500 in PBS containing 20% FCS for 1 h, followed by three washes with PBS. Nuclei were counterstained with DAPI (200 ng/ml). Slides were mounted with Vectashield mounting medium (Vector Laboratories) and sealed with nail polish. Microscopy and image analysis were performed on a Leica SP5 II laser scanning confocal microscope.

### **Comet Assays**

DNA was stained with 0.5 µg/ml DAPI for 10 min. Between 69 and 500 randomly selected cells per slide were examined for the presence or absence of comets using fluorescence microscopy. The cells were assigned to three different categories according to their tail size. Percentage of cells in each category was calculated for two biological replicates separately and for pooled data. To evaluate analysis by visual inspection, comets were analysed by measuring integrated density of DAPI signal in comet heads and entire comets using ImageJ and calculating % DNA in comet tails after subtracting the background fluorescence from a neighboring dark area of equivalent size. To assess DNA damage accumulation during adipogenic differentiation, undifferentiated hASCs were transfected with siSNEV and control siRNA and induced to differentiate 48 h post transfection as described. Comet assays were carried out using differentiated and undifferentiated cells, as described.

### ***C. elegans* strains**

Strains used in this work include N2 (provided by V. Jantsch) and CF1814 [*rrf-3*(pk1426) II, *daf-2*(e1370) III]. All strains are available through the Caenorhabditis Genetics Center (CGC).

### **RNA interference in *C. elegans***

The HT115 strain of *E. coli* carrying the RNAi-construct or the empty vector (L4440) as control, was cultured overnight in liquid LB medium with ampicillin and tetracyclin at 37 °C. The bacteria were harvested by centrifugation, re-suspended in LB to a concentration of 60 mg/ml and 200 µl of this suspension was seeded on NGM plates containing 1 mM IPTG and 25 µg/ml Carbenicillin. Plates were incubated at 37 °C overnight and used within one week.
